1 **Functionally asymmetric motor neurons coordinate locomotion of *Caenorhabditis elegans***

2 Oleg Tolstenkov<sup>1,2,3</sup>, Petrus Van der Auwera<sup>1,2,4</sup>, Jana F. Liewald<sup>1,2</sup>, Wagner Steuer Costa<sup>1,2</sup>, Olga  
3 Bazhanova<sup>1</sup>, Tim Gemeinhard<sup>1,2</sup>, Amelie C.F. Bergs<sup>1,2,5</sup>, Alexander Gottschalk<sup>1,2,3,\*</sup>

4 <sup>1</sup>Buchmann Institute for Molecular Life Sciences (BMLS), Goethe University, Max von Laue Str. 15, D-60438 Frankfurt,  
5 Germany

6 <sup>2</sup>Institute for Biophysical Chemistry, Goethe University, Max von Laue Str. 9, D-60438 Frankfurt, Germany

7 <sup>3</sup>Cluster of Excellence Frankfurt - Macromolecular Complexes (CEF-MC), Goethe University, Max von Laue Str. 15, D-  
8 60438 Frankfurt, Germany

9 <sup>4</sup>Department of Biology, Functional Genomics and Proteomics Unit, Katholieke Universiteit Leuven, 3000 Leuven,  
10 Belgium

11 <sup>5</sup>International Max Planck Research School in Structure and Function of Biological Membranes, Max von Laue Str. 3, D-  
12 60438 Frankfurt, Germany

13 \*Correspondence: [a.gottschalk@em.uni-frankfurt.de](mailto:a.gottschalk@em.uni-frankfurt.de)

14

15 **Highlights**

16 A class of motor neurons with unidentified function – AS cholinergic motor neurons - was  
17 characterized in *C. elegans*.

18 AS neurons show asymmetry in both input and output and are specialized in coordination of dorso-  
19 ventral undulation bends.

20 AS neurons mediate antero-posterior propagation of the undulatory body wave during locomotion.

21 AS neurons integrate signals for forward and reverse locomotion from premotor interneurons and may  
22 gate ventral nerve cord central pattern generators (CPGs) via gap junctions.

23

24

## 25 **Summary**

26 **Invertebrate nervous systems are valuable models for fundamental principles of the control of behavior.**  
27 **Ventral nerve cord (VNC) motor neurons in *Caenorhabditis elegans* represent one of the best studied**  
28 **locomotor circuits, with known connectivity and functional information about most of the involved**  
29 **neuron classes. However, for one of those, the AS motor neurons (AS MNs), no physiological data is**  
30 **available. Combining specific expression and selective illumination, we precisely targeted AS MNs by**  
31 **optogenetics and addressed their role in the locomotion circuit. After photostimulation, AS MNs induce**  
32 **currents in post-synaptic body wall muscles (BWMs), exhibiting an initial asymmetry of excitatory**  
33 **output. This may facilitate complex regulatory motifs for adjusting direction during navigation. By**  
34 **behavioral and photo-inhibition experiments, we show that AS MNs contribute to propagation of the**  
35 **antero-posterior body wave during locomotion. By  $Ca^{2+}$ -imaging in AS MNs and in their synaptic**  
36 **partners, we also reveal that AS MNs play a role in mediating forward and backward locomotion by**  
37 **integrating activity of premotor interneurons (PINs), as well as in coordination of the dorso-ventral body**  
38 **wave. AS MNs do not exhibit pacemaker properties, but potentially gate VNC central pattern generators**  
39 **(CPGs), as indicated by ceasing of locomotion when AS MNs are hyperpolarized. AS MNs provide**  
40 **positive feedback to the PIN AVA via gap junctions, a feature found also in other locomotion circuits. In**  
41 **sum, AS MNs have essential roles in coordinating locomotion, combining several functions, and**  
42 **emphasizing the compressed nature of the *C. elegans* nervous system in comparison to higher animals.**

43

## 44 **Introduction**

45 Locomotion represents a basic component of many complex behaviors and is regulated by neuronal  
46 circuits that share similar properties in a wide variety of species, including humans (Guertin, 2013;  
47 Kiehn, 2011; Mullins et al., 2011). These circuits, as shown in virtually all model systems studied, can  
48 generate rhythmic motor patterns without sensory inputs, and therefore act as CPGs (Pearson, 1993).  
49 In higher vertebrates CPGs are very complex systems and represent distributed networks made of  
50 multiple coupled oscillatory centers, grouping in pools as discrete operational units (Fidelin et al.,  
51 2015; Kiehn et al., 2010; Rybak et al., 2015). Motor neurons (MNs) within the pool are able to  
52 integrate convergent inputs; they are recruited and activated gradually, which underlies the variable  
53 changes in muscle tension that are necessary for movement. Overlaid on these circuits are interactions  
54 with (and between) premotor interneurons (PINs, also called command interneurons), which modulate  
55 the patterns of MN activity and coordinate the CPGs (Goulding, 2009). In mammals, it is particularly  
56 the commissural interneurons (CIN) which regulate activity of left and right CPGs, and which may  
57 therefore themselves act as rhythm generators. Such neurons are often excitatory (e.g. CINe1 of the  
58 mouse; Kiehn, 2016), but can also be inhibitory (e.g. CINi), while others act as electrical connectors or  
59 activity ‘sinks’ for CPGs and motor neuron pools. An example are ipsilateral V2a interneurons in

60 zebrafish, which are retrogradely recruited by motor neurons (Song et al., 2016) to modulate their  
61 activity.

62 Despite the difference in the forms of locomotion and anatomy of neural circuits between  
63 vertebrates and invertebrates, they share similar principles. Yet, how complex vertebrate locomotion  
64 circuits operate and how they developed from more simple ones is not understood in its entirety, thus a  
65 comprehensive analysis of invertebrate circuits is a prerequisite to this goal. The relative simplicity of  
66 invertebrate nervous systems has helped to develop concepts that guide our understanding of how  
67 complex neuronal networks operate (Marder et al., 2005; Selverston, 2010). *C. elegans* is a nematode  
68 with only 302 neurons in the hermaphrodite. A fully reconstructed wiring diagram of its neural circuits  
69 (Varshney et al., 2011; White et al., 1986) and various tools for imaging and (opto)genetic  
70 interrogation of circuit activity (Fang-Yen et al., 2015; Leifer et al., 2011; Nagel et al., 2005; Stirman  
71 et al., 2011) render *C. elegans* a useful model to study fundamental principles of the neuronal control  
72 of behavior.

73 *C. elegans* moves by generating waves of dorso-ventral bends along its body. These  
74 predominantly lead to forward movement, which is occasionally interrupted by brief backing episodes,  
75 the frequency of which is modulated by sensory responses (Cohen and Sanders, 2014; Gjorgjieva et  
76 al., 2014; Pierce-Shimomura et al., 2008; Zhen and Samuel, 2015). The animal's undulations are  
77 controlled by neural circuits in the head and VNC. The core components of the motor circuits in *C.*  
78 *elegans* include head motor/interneurons that exhibit oscillations during alternating head bending  
79 (Hendricks et al., 2012; Shen et al., 2016), and which are transmitted to the remainder of the body  
80 (mainly) by proprioceptive feedback (Wen et al., 2012). In the body, motor neurons are found in  
81 ensembles or subcircuits, repeating 6 times from the 'neck' to the tail of the animal, containing one or  
82 two neurons of each class (6-13 neurons found in the individual classes, with 11 AS MNs; Haspel and  
83 O'Donovan, 2011; White et al., 1986). Upstream of the motor neurons are PINs which integrate inputs  
84 from sensory and other interneurons, and that relay their activity in a gating fashion: They are  
85 themselves not oscillatory, but set up- or down-states of the motor neurons, using gap junction  
86 networks, in a manner similar to the V2a interneurons of the fish (Song et al., 2016). The classes of  
87 MNs are distinguished by transmitter used (acetylcholine or GABA), ventral or dorsal innervation, and  
88 roles in forward or backward locomotion (Von Stetina et al., 2005; Zhen and Samuel, 2015). Functions  
89 of the different types of MNs are understood to various degrees. For example, the DA9 A-type MN  
90 was recently demonstrated to generate intrinsic rhythmic activity by P/Q/N-type  $Ca^{2+}$  channels, which  
91 is potentiated by activity of the reversal PIN AVA (Gao et al., 2017). Thus, motor neurons, rather than  
92 interneurons, can be oscillators, demonstrating that different activities are compressed in the *C.*  
93 *elegans* motor circuit with its limited number of cells. To fully understand these circuits, all of the

94 motor neurons need to be characterized. However, for the cholinergic AS MN class, representing one  
95 fifth of VNC cholinergic neurons, surprisingly no physiological data is available. Yet, these neurons  
96 are interesting in that they asymmetrically innervate only dorsal muscle and ventral inhibitory VD  
97 neurons. Further, in contrast to other MN types, the AS MNs are innervated extensively by chemical  
98 synapses from both forward and reverse PINs, and they also form gap junctions with these cells.

99 In this study, we investigated the role of AS MNs in the VNC locomotor circuit based on  
100 predictions made from the wiring diagram, using optogenetic tools, electrophysiology, behavioral  
101 analysis, and  $Ca^{2+}$  imaging in immobilized and moving animals. We reveal important roles of AS MNs  
102 in dorso-ventral and antero-posterior coordination of undulations during locomotion, as stimulation of  
103 AS MNs distorts, and inhibition blocks, propagation of the body wave. We show that AS MNs act  
104 through excitation of dorsal muscles and inhibitory ventral VD motor neurons. The intrinsic activity of  
105 the AS MNs correlates best with forward locomotion, which corresponds to a stronger response of AS  
106 MNs to photodepolarization of the forward PIN AVB. Functionally asymmetric electrical connections  
107 suggest AS MN feedback control of the backward PIN AVA, a feature recently observed for  
108 locomotor circuits also in other animals (Matsunaga et al., 2017; Song et al., 2016).

109

## 110 **RESULTS**

### 111 **Selective expression and activation of optogenetic tools in AS MNs**

112 Six classes of cholinergic MNs are involved in mediating the dorso-ventral sinusoidal wave observed  
113 during locomotion of *C. elegans*: DA, VA, DB, VB, VC and AS. Up to date, no promoter exclusively  
114 triggering expression in AS MNs is known. To achieve specific activation of AS MNs, we used a  
115 subtractive approach for expression combined with selective illumination. The *punc-17* promoter (*unc-*  
116 *17* encodes the vesicular acetylcholine transporter) drives expression in all cholinergic neurons  
117 including the MNs in the VNC. In combination with *pacr-5* (driving expression in the DB and VB  
118 MNs) and *punc-4* (driving expression in the DA, VA and VC MNs), we could restrict expression of  
119 optogenetic tools to the AS MNs (**Fig. 1A, B**): Briefly, broad expression from *punc-17* was suppressed  
120 in the DB, VB, DA, VA and VC neurons by expressing dsRNA constructs targeting the optogenetic  
121 tool using *pacr-5* and *punc-4* promoters (**Fig. 1AI**). Alternatively, we used the Q system (Wei et al.,  
122 2012): We placed the QF transcriptional activator under the *punc-17* promoter, thus driving expression  
123 of the optogenetic tool from constructs harboring the QUAS QF binding motif. To restrict expression  
124 to AS MNs in the VNC, we additionally used the QS suppressor under the *pacr-5* and *punc-4*  
125 promoters (**Fig. 1AII**). Last, since these approaches still led to expression in additional cholinergic  
126 neurons in head and tail ganglia, we avoided activation of optogenetic tools in those cells by selective

127 illumination of segments of the animals body that correspond to AS MNs (Husson et al., 2012; Stirman  
128 et al., 2011, 2012; **Fig. 1AIII**).

### 129 **Depolarization of AS MNs activates body wall muscles (BWMs) and increases body bending** 130 **during locomotion**

131 *C. elegans* moves by propagating undulation waves along the body. Body bends are generated by  
132 cholinergic neurons mediating contraction of muscles on one side, and by GABAergic neurons  
133 mediating simultaneous relaxation of the contralateral side of the body (Donnelly et al., 2013; McIntire  
134 et al., 1993). According to the wiring diagram (Chen et al., 2006; Varshney et al., 2011; White et al.,  
135 1986) AS MNs send synapses mostly to the dorsal BWM cells (68, i.e. 47 % of all presynaptic  
136 contacts) and to inhibitory ventral (GABAergic) VD MNs (66 synapses, i.e. 46 %). To confirm that  
137 depolarization of the AS MNs evokes postsynaptic currents, we expressed and photo-activated  
138 channelrhodopsin-2 (ChR2(H134R); Nagel et al., 2005) in AS MNs, while recording electrically from  
139 dorsal muscles in dissected preparations (**Supplementary Fig. S1A**). We preserved commissural  
140 connections from the ventral nerve cord (where AS MN cell bodies reside), by cutting on the left side  
141 (i.e. opposite to where the AS commissures run). *C. elegans* MNs exhibit spontaneous activity leading  
142 to miniature post synaptic currents (mPSCs), but may generate rhythmic PSC bursts when triggered by  
143 PIN activation (Butler et al., 2014; Gao and Zhen, 2011; Kawano et al., 2011; Liewald et al., 2008; Liu  
144 et al., 2017; Schultheis et al., 2011; Wen et al., 2012). When activating AS MNs using ChR2, we  
145 observed a large peak current (ca. 400 pA), followed by mPSC firing at an increased rate for the  
146 duration of the illumination. This activity was similar to previously observed tonic activity after  
147 prolonged ChR2 activation of all cholinergic neurons (Liewald et al., 2008; Liu et al., 2009). Thus,  
148 depolarization did not induce any obvious intrinsic rhythmic activity in AS MNs.

149 Next, we measured parameters of crawling in intact worms moving freely on agar substrate.  
150 Activation of ChR2 in all cholinergic neurons including VNC MNs leads to strong contraction of the  
151 worm body and coiling (Zhang et al., 2007; Liewald 2008). AS MNs innervate only dorsal muscles,  
152 thus we wondered if their simultaneous depolarization would hinder propagation of the body bending  
153 wave. Animals in which ChR2 was activated in AS MNs kept the ability to propagate the undulation,  
154 yet they displayed a distorted wave, deeper bending (**Fig. 1C**), and transiently reduced speed (**Fig.**  
155 **1DI, II**). Furthermore, photo-depolarization of AS MNs evoked body contraction, though this was  
156 reduced when compared to ChR2 activation of all VNC cholinergic MNs (**Fig. 1DIII, IV**). These  
157 behavioral phenotypes were blue-light dependent, and absent in transgenic animals raised without all-  
158 *trans* retinal (ATR), the obligate ChR2 co-factor. As the locomotion bending wave propagates from  
159 head to tail, we probed how AS MN activity contributes to this propagation. We thus stimulated AS  
160 MNs in small segments of the body (anterior, midbody, posterior; **Fig. 1EI**). These manipulations

161 neither caused marked disruption of the wave (**Fig. 1EII**), nor did they reduce speed. However, they  
162 led to a reduction of body length (**Supplementary Fig. S1BI-VI**), most pronounced after stimulation  
163 of the anterior segment. In sum, AS MN depolarization facilitates, but may not play an instructive role  
164 in generating the undulatory wave.

### 165 **AS MN depolarization causes asymmetric BWM activation and a dorsal bias during locomotion**

166 In contrast to the A and B class MNs, the AS MNs have no ‘opposing’ partner neurons (like VA/DA or  
167 VB/DB) and innervate (dorsal) BWMs and inhibitory VD neurons (that innervate ventral muscle). We  
168 wondered whether this evokes biased activation of dorsal BWMs, and thus used  $\text{Ca}^{2+}$  imaging  
169 (GCaMP3) in BWMs of immobilized animals (**Fig. 2AI**), while we photostimulated (ChR2) AS MNs.  
170 In animals raised with ATR, we observed asymmetric responses in the BWM during photoactivation  
171 of AS MNs: The  $\text{Ca}^{2+}$  signal in dorsal muscle cells increased, while it simultaneously decreased in the  
172 ventral muscles (**Fig. 2AII-IV, Supplementary Video S2**). In contrast, no such effect was observed in  
173 animals raised without ATR, i.e. containing non-functional ChR2: Here, when averaged over many  
174 animals, no net change in  $\text{Ca}^{2+}$  signals occurred, as spontaneously arising fluctuations canceled out.  
175 This functional asymmetry during AS MN photostimulation also affected locomotion, as these animals  
176 crawled in circles (**Fig. 2BI; Supplementary Video S1**). This was due to a bias towards the dorsal  
177 side, measured at the anterior body (**Fig. 2BIII-VI**), and leading to a mild, but significant increase in  
178 average bending along the body (**Fig. 2BV, VI**). In contrast, when all VNC cholinergic neurons were  
179 stimulated, animals showed deep bending with no dorsal or ventral bias, thus strongly slowing  
180 locomotion (**Figs. 1DI, II; 2BII, V, VI**). In sum, depolarization of AS MNs contributes to dorso-  
181 ventral coordination and likely facilitates navigation.

### 182 **AS MN ablation disrupts the locomotion pattern**

183 The observed effects indicated an ability of AS MNs to evoke the bending wave during forward  
184 locomotion, and that they may play an important role in generating locomotion patterns. We probed  
185 the necessity of AS MNs for locomotion by ablation, as described earlier for other MNs and PINs  
186 (Chalfie et al., 1985; Gao et al., 2017; McIntire et al., 1993; Piggott et al., 2011). To this end, we used  
187 the genetically encoded, membrane targeted (*via* a pleckstrin homology -PH- domain) blue light  
188 activated miniature Singlet Oxygen Generator (PH-miniSOG; Xu and Chisholm, 2016) and targeted  
189 illumination (**Fig. 3AI**). Brief illumination of the AS MNs with 470 nm light (2 mW/mm<sup>2</sup>, 2.5 min) led  
190 to visible and quantifiable locomotion defects: Animals with ablated AS MNs retained the ability to  
191 move, but crawled with lower speed, increased bending angles and an overall distorted undulation  
192 wave along the body, with a highly irregular pattern (**Fig. 3AII-IV, Supplementary Fig. S2A;**  
193 **Supplementary Video S3**). Thus, ablation of AS MNs disrupted coordination of the bending wave.

## 194 **Chronic hyperpolarization of AS MNs eliminates Ca<sup>2+</sup> activity in dorsal BWMs**

195 Photodepolarization of AS MNs caused opposite effects on Ca<sup>2+</sup> signals in dorsal and ventral muscles  
196 (**Fig. 2**). We wondered whether hyperpolarization of AS MNs may have reciprocal effects. AS MNs  
197 form excitatory chemical synapses to dorsal muscle and to VD MNs (the latter inhibit ventral muscle),  
198 but also gap-junctions (to VA MNs, exciting ventral muscle). Thus, several outcomes are conceivable:  
199 1) Decrease of Ca<sup>2+</sup> levels in dorsal, and increase in ventral muscles; 2) AS MN hyperpolarization may  
200 reduce ventral muscle activity via gap junctions to VA MNs; 3) A mixture of both, possibly causing  
201 oscillations. We thus used the *Drosophila* histamine-gated Cl<sup>-</sup>-channel HisCl1 (Pokala et al., 2014), as  
202 a hyperpolarizing tool (**Fig. 3BI**). Since *C. elegans* has no endogenous histamine receptors, HisCl1 can  
203 be specifically activated using histamine. First, we incubated animals expressing HisCl1 in AS MNs  
204 with histamine, and compared them to controls not incubated with histamine (**Fig. 3BII**;  
205 **Supplementary Fig. S2B**; **Video S4**). Animals on histamine plates moved significantly slower (ca. 75  
206 % reduction) than animals without histamine, demonstrating that AS MNs are actively involved in  
207 promoting locomotion (however, this manipulation also affects other cholinergic neurons outside the  
208 VNC; see below). To analyze the possible reason for the reduced speed, we analyzed the crawling  
209 body postures (**Fig. 3BIII**). Histamine exposure strongly disturbed the propagation of the body wave,  
210 leading to very slow and irregular movement and frequent directional changes. To assess the effects of  
211 constant AS MN hyperpolarization on muscle physiology and activity, we expressed the red  
212 fluorescent Ca<sup>2+</sup> indicator RCaMP in BWM cells (Akerboom et al., 2013), and analyzed spontaneous  
213 Ca<sup>2+</sup> signals in ventral and dorsal muscles, in immobilized animals (**Fig. 3BIV**), either without or with  
214 histamine. Consistent with the dorsal innervation of muscles by AS MNs, spontaneous Ca<sup>2+</sup> activity in  
215 animals with hyperpolarized AS MNs was observed only in ventral BWM, and animals showed ventral  
216 bending. Over time, on histamine, ventral Ca<sup>2+</sup> fluctuations had much higher amplitude, while animals  
217 without histamine showed comparable and low amplitude fluctuations in both dorsal and ventral  
218 muscles (**Fig 3BV-VII**). In sum, hyperpolarization of AS MNs inhibits their excitatory signaling to  
219 dorsal muscles, and blocks their activation of GABAergic VD motor neurons, which in turn leads to  
220 ventral muscle disinhibition. This causes a strong bias to uniform ventral muscle activation, which  
221 likely disrupts propagation of the body wave.

## 222 **Acute hyperpolarization of AS MNs induces ventral muscle contraction through disinhibition**

223 Chronic hyperpolarization of AS MNs by HisCl1 lacks temporal resolution, and, due to the expression  
224 from the *unc-17* promoter, despite our ‘subtractive’ expression, hyperpolarization of head and tail  
225 neurons could affect the outcome of these experiments. To avoid inhibition of these neurons, we  
226 looked for a potent hyperpolarizing optogenetic tool, enabling to use selective illumination for specific

227 AS MN inhibition. We thus used the natural Cl<sup>-</sup>-conducting anion channel rhodopsin (ACR1), which  
228 causes strong (shunting) inhibition upon illumination (Sineshchekov et al., 2015; **Fig. 4A**).

229 Acute, ACR1-induced photo-hyperpolarization of all cholinergic neurons in freely moving  
230 animals strongly reduced crawling speed (to below 20 %) and essentially stopped locomotion (**Fig. 4B**,  
231 **C**). When we restricted expression of ACR1 and illumination to the AS MNs, we observed a similar  
232 reduction of speed, though not as pronounced (to ca. 35% of the initial speed; **Fig. 4B**). Controls  
233 (animals raised without ATR) showed no change in locomotion speed. These results, together with the  
234 HisCl1 experiments may suggest that the speed reduction was caused by a lack of ACh release from  
235 AS MNs to dorsal muscles. As this should cause partial relaxation of the body, we analyzed body  
236 length: For animals expressing ACR1 in all cholinergic neurons, we observed a prominent body  
237 elongation, in line with the absence of all excitatory (cholinergic) transmission to muscle (**Fig. 4C**).  
238 However, hyperpolarization of only the AS MNs led to partial and transient body contraction (**Fig. 4C**,  
239 **Supplementary Video S5**). This might be explained by synaptic connections of AS MNs to the  
240 GABAergic VD MNs: Hyperpolarization of AS MNs would reduce excitation of VD MNs, which in  
241 turn would cause dis-inhibition of muscle cells, and thus contraction. To test this, we repeated the  
242 experiment in *unc-47(e307)* mutants, lacking the vesicular GABA transporter, and thus GABAergic  
243 transmission. Consistently, *unc-47* mutants showed relaxation instead of contraction of BWMs (**Fig.**  
244 **4C**). Body wave propagation was strongly attenuated, as for the analogous experiment using HisCl1 in  
245 AS MNs; however, using ACR1, this was induced within 2-3 s of illumination. Last, we probed if  
246 local AS MN inhibition (i.e. in anterior, midbody or posterior neurons) would block the propagation of  
247 the wave posterior from this point (**Fig. 4D**). This was the case: In about half of the animals tested,  
248 inhibition of anterior and midbody AS neurons hindered propagation of the wave to the posterior part  
249 of the body, leading to dragging behind of the tail region (**Fig. 4D**, **Supplementary Videos S6-8**).  
250 Analyses of the extent of movement in individual body segments showed that a reduction of  
251 movement was also found in the head region, however, this was more pronounced toward the  
252 posterior, particularly when the midbody AS neurons were inhibited (**Fig. 4E**; **Supplementary Fig.**  
253 **S3A** shows how the eleven 3-point angles analyzed correspond to illuminated body segments): The  
254 extent of reduction in body movement in the anterior part of the animal was significantly smaller than  
255 the change in posterior body movement (**Fig. 4F**). Animals also showed a reduction of speed, though  
256 not as pronounced as when all AS MNs were hyperpolarized, and length was not affected  
257 (**Supplementary Fig. S3BI-IV**). When the posterior segment was hyperpolarized, no obvious effects  
258 were observed. In sum, AS MNs are required for antero-posterior propagation of the body wave.

259 **Oscillatory AS MN activity correlates more strongly with body bends during forward crawling**



260 Measuring  $\text{Ca}^{2+}$  transients in the ventral cord MNs during locomotion revealed higher activity states  
261 for B- and A-type MNs during forward and backward locomotion, respectively (Haspel et al., 2010;  
262 Kawano et al., 2011; Qi et al., 2013). Correlation of  $\text{Ca}^{2+}$  traces in AS MNs with dorsal body bends  
263 was previously shown in freely crawling animals (Faumont et al., 2011). Considering the unique  
264 situation of AS MNs, i.e. coupling with both forward and backward command interneurons, we  
265 wondered if AS MNs would maintain equal activity during both locomotion states. Thus, we measured  
266  $\text{Ca}^{2+}$  transients in AS6 and AS7 in moving animals.

267 AS6 and AS7 showed oscillatory activity during locomotion, which was correlated with the  
268 change of body bends. During forward crawling, (anterior) AS6 activity preceded (posterior) AS7  
269 activity by about 1-2 s (**Fig 5A, B; Supplementary Video S9**). To understand if AS MN  $\text{Ca}^{2+}$   
270 transients are related to the locomotion body wave, we measured the angle defined by the position of  
271 AS6, the vulva, and AS7. We then performed cross-correlation analysis (for individual undulations,  
272 i.e. full periods of the bending wave) of the  $\text{Ca}^{2+}$  signal in AS6 or AS7 and the respective bending  
273 angle at the given time (**Fig. 5C, Supplementary Video S9**). Here, the  $\text{Ca}^{2+}$  signal in AS6 preceded  
274 the maximal bending at the vulva by about 2 s, while the signal in AS7 coincided (these correlations  
275 were moderate, but significant, the coefficients were  $\sim 0.35$ ). Thus, the wave of activity in AS MNs  
276 appears to travel antero-posteriorly at the time scale of the undulatory wave (under a cover slip,  
277 slowing down locomotion; in animals moving freely on agar, the wave oscillates with ca. 0.5 Hz (Gao  
278 et al., 2017), while here, the delay of two maxima of undulation is ca. 3-4 s; **Fig. 5B**). We also  
279 measured cross-correlation between the  $\text{Ca}^{2+}$  signals in the AS6 and AS7 neurons (coefficient  $\sim 0.33$ ).  
280 During reversal periods, as sometimes observed in our  $\text{Ca}^{2+}$  imaging experiments (**Fig. 5B**), there was  
281 essentially no correlation (coefficient  $\sim \pm 0.1$ ) of AS6 and AS7  $\text{Ca}^{2+}$  signals with the vulva bending  
282 angles, or with each other, and there was also no obvious time lag between these signals (**Fig. 5D**).  
283 Yet, the peaks of AS6 and AS7  $\text{Ca}^{2+}$  signals did not reveal any difference between forward and reverse  
284 movements, indicating that the cells were equally active during forward and reverse locomotion (**Fig**  
285 **5E**). In sum, AS MNs showed oscillatory activity that was more strongly correlated with body bends  
286 during forward than during backward crawling.

### 287 **AS MNs integrate signaling from both forward and backward premotor-interneurons**

288 The PINs AVA, AVD, and AVE connect to the DA and VA MNs, and induce reversals and backward  
289 locomotion. Conversely, the PINs AVB and PVC are connected to the DB and VB forward MNs and  
290 mediate forward locomotion (Chalfie et al., 1985; Chronis et al., 2007; Kawano et al., 2011; Piggott et  
291 al., 2011; Qi et al., 2013; Wicks et al., 1996). Endogenous as well as stimulated activity of the PINs  
292 modulates activity of A- and B-type MNs (Kawano et al., 2011; Liu et al., 2017).

293 The AS MNs are postsynaptic for both backward (synapse number: AVA - 63, AVE - 7) and  
294 forward PINs (AVB - 13, PVC - 2). This suggests a bias of AS MNs for backward locomotion;  
295 however, as synapse number is not the only determinant of synaptic weight, also the opposite (as  
296 indicated by our AS MN  $Ca^{2+}$  imaging data) is conceivable. No chemical synapses are known from AS  
297 MNs towards the PINs, yet, there are 37 gap junctions reported between AVA and the AS MNs as well  
298 as 5 gap junctions between AVB and the AS MNs. Electrical synapses could mediate anterograde as  
299 well as retrograde signaling between AS MNs and PINs (Chen et al., 2006; Varshney et al., 2011;  
300 White et al., 1986). To assess whether depolarization of AVA and AVB would lead to observable  
301 and/or different  $Ca^{2+}$  responses in the AS MNs, we generated strains expressing ChR2 in the PINs and  
302 GCaMP6 in AS MNs (**Fig. 6AI**): One strain specifically expressed ChR2 in AVA (Schmitt et al.,  
303 2012) and another strain expressed ChR2 from the *sra-11* promoter in AIA, AIY, and AVB neurons,  
304 of which only AVB has direct synaptic connections to AS MNs. The respective animals were  
305 photostimulated and  $Ca^{2+}$  transients were measured in AS3 (anterior) and AS8 (posterior) MNs of  
306 immobilized animals, raised either in absence or presence of ATR (i.e. without and with functional  
307 ChR2). Stimulation of AVA or AVB both resulted in a steady, synchronous increase of the  $Ca^{2+}$  signal  
308 in the AS3 neuron; however, no increase was observed in animals raised without ATR (**Fig. 6AII-IV**;  
309 **Supplementary Videos S10, S11**). A similar increase was found in the AS8 neuron, and both AS3 and  
310 AS8 showed a synchronized increase of activity (**Supplementary Fig. S4A, B**). Thus, signaling from  
311 both forward and backward PINs is excitatory to the AS MNs. However, there was a clear difference  
312 in the response of the AS MNs to AVA vs. AVB stimulation, as depolarization of AVA produced a  
313 response of comparably low amplitude (up to 20 %  $\Delta F/F$  after 3 s), while depolarization of AVB  
314 caused a response of significantly higher amplitude (up to 40 %  $\Delta F/F$ ; **Fig. 6AIV**). This could be due  
315 to differences in synaptic strength and/or ratio of chemical and electrical synapses between AVA-AS  
316 and AVB-AS, and may represent a physiological correlate of the apparently different involvement of  
317 AS MNs in forward vs. backward locomotion (**Fig. 5C, D**). Such inequality in regulated behavior  
318 based on imbalances in wiring was also observed for the PINs and A- and B-class MNs (Kawano et al.,  
319 2011; Roberts et al., 2016). Thus, despite predominant chemical synaptic connections between AVA  
320 and AS, AVB depolarization had stronger effects on AS MNs.

### 321 **Retrograde electrical signaling from AS MNs depolarizes AVA but not AVB interneurons**

322 Recent observations revealed that AVA coupling to A-type MNs via gap junctions is strongly  
323 rectifying towards AVA (Liu et al., 2017). We thus wanted to explore the role of the electrical  
324 synapses between the PINs and the AS MNs in more detail, e.g. whether AS MN photostimulation  
325 could lead to depolarization of the PINs.

326 We generated strains expressing the ratiometric  $\text{Ca}^{2+}$  indicatorameleon (bearing CFP and YFP  
327 moieties; Miyawaki et al., 1997) in the command interneurons (driven by *sra-11* and *nmr-1* promoters,  
328 for expression in AVB and AVA, respectively) together with ChR2 expressed in the AS MNs (**Fig.**  
329 **6BI**). Both promoters express in several head neurons, yet we could identify AVB and AVA by their  
330 position with respect to anatomical landmarks and with respect to other (known) fluorescent neurons.  
331 Photodepolarization of the AS MNs (in animals raised in the presence of ATR) caused  $\text{Ca}^{2+}$  transients  
332 in AVA ( $\Delta\text{R/R} \sim 10\%$ ), but had no significant effect on  $\text{Ca}^{2+}$  activity in AVB interneurons (**Fig. 6BII-**  
333 **IV**). A small ( $\Delta\text{R/R} \sim 3\text{-}4\%$ ), insignificant increase of the ratio of the CFP/YFP signal was observed in  
334 the control animals raised without ATR, in both AVA and AVB. AS MNs express UNC-7 and INX-3  
335 as the sole innexins. INX-3 is widely expressed in multiple tissues, and AVA and AVB also express  
336 UNC-7 (Altun et al., 2009; Starich et al., 2009). Thus, we used an *unc-7(e5)* null mutant, in which no  
337 electrical coupling should occur between AS MNs and AVA or AVB, and repeated the above  
338 experiments: The  $\text{Ca}^{2+}$  signal ( $\Delta\text{R/R} \sim 4\%$ ) was now comparable to the signal observed in the control  
339 without ATR, indicating that UNC-7 electrical synapses are responsible for transmission between AS  
340 MNs and AVA. For AVB, we did not observe any significant effect in the *unc-7(e5)* mutant.

341

## 342 **DISCUSSION**

343 Movement by undulations is remarkably effective across scales and in a variety of environments  
344 (Cohen and Sanders, 2014). Despite the diversity of their anatomy, the nervous systems of distantly  
345 related organisms may adopt similar strategies to control locomotion by undulations. Based on  
346 physiological data we revealed several features of the AS MNs highlighting their function in one of the  
347 most studied locomotion circuits, the VNC of *C. elegans*. The main findings of this work are: 1)  
348 Depolarization of AS MNs does not disrupt locomotion, but causes a dorsal bias. 2) AS MN  
349 hyperpolarization inhibits locomotion and prevents generation and propagation of the undulatory  
350 wave. 3) AS MN activity during locomotion is oscillatory, and is correlated more with forward than  
351 with backward locomotion. 4) AS MNs are stimulated by premotor interneurons, where the forward  
352 PIN AVB exerts stronger activity in AS MNs than the backward PIN AVA. 5) AS MNs exhibit  
353 functional electrical connections to the backward PIN AVA. Our findings for AS MNs in the *C.*  
354 *elegans* locomotor circuit have parallels in several animal models (see below).

### 355 **AS MNs act in coordination of dorso-ventral bends, antero-posterior wave propagation and** 356 **possibly forward-backward states**

357 AS MNs occupy a significant part of the VNC circuit (11 of 75 neurons) and two AS MNs are present  
358 in each functional segment of the circuit (Haspel and O'Donovan, 2011). Yet, in absence of

359 physiological information, they were missing in many models representing the locomotor circuit  
360 function in *C. elegans* (Von Stetina et al., 2005; Zhen and Samuel, 2015). We showed that AS MNs  
361 are important for several aspects of locomotion, among them dorso-ventral coordination: Their  
362 depolarization induces postsynaptic currents in dorsal BWMs leading to contraction and dorsal bias in  
363 freely moving animals, while AS MN hyperpolarization eliminates activity in dorsal BWMs and  
364 induces contraction of contralateral ventral BWMs through disinhibition. Thus, it is likely that AS  
365 MNs counteract neurons providing a ventral bias, e.g. the VA and VB MNs, or even the VC neurons  
366 (Faumont et al., 2011; White et al., 1986). This corresponds to recent computational studies, which  
367 predicted a significant role of AS MNs in coordinating dorso-ventral bending (Olivares et al., 2017)  
368 and in the control of BWMs (Yan et al., 2017). Furthermore, AS MNs are active both during forward  
369 and reverse locomotion, however, correlation of their activity with movement is strong only for  
370 forward locomotion. In line with this, AS MN inhibition disrupts propagation of the antero-posterior  
371 body wave. Since the AS MNs connect to both forward and backward PINs, they could play a role in  
372 integrating forward and backward locomotion motifs, e.g. by providing an electrical sink (or source)  
373 for the PINs of the respective opposite direction (**Fig. 7A, B**). Similar functions were shown for A-type  
374 MNs and AVA (Kawano et al., 2011; Liu et al., 2017) as well as for V2a interneurons and MNs in  
375 zebrafish (Song et al., 2016).

376 AS MNs as other MN types innervate only one side of the BWMs (dorsal). However, unlike  
377 other MN classes, AS MNs have no obvious class of ‘partner’ neurons innervating only ventrally (of  
378 the VC neurons, which innervate ventral muscle, there are only six, and two of them mainly innervate  
379 vulval muscle). AS MNs thus provide asymmetric excitation, which may be required to enable  
380 complex regulatory tasks like changing direction during navigation. Indeed, optogenetic depolarization  
381 of AS MNs, resulting in curved locomotion tracks, mimicked the ‘weathervane’ mode of navigation  
382 towards a source of attractive salt (Iino and Yoshida, 2009). During locomotion, higher order neurons,  
383 that integrate sensory information, might influence the AS MNs to generate this bias to the dorsal side.  
384 In the lamprey, lateral bends were shown to be caused by asymmetry in stimulation of the  
385 mesencephalic locomotor region (Sirota et al., 2000), and in the freely moving lamprey even  
386 comparatively small left or right asymmetries in activity of the reticulospinal system corresponded to  
387 lateral turning (Deliagina et al., 2000).

388 Asymmetry in contralateral motifs of complex locomotor circuits is also known from vertebrate  
389 spinal cord CPGs in flexor-extensor coordination (Grillner and Wallén, 2002). In mice, flexor motor  
390 neurons are predominantly active and inhibit extensor motor neurons, which in turn show intervals of  
391 tonic activity between inhibitory states, corresponding to flexor bursts (Machado et al., 2015; Rybak et  
392 al., 2015). When comparing numbers of synaptic inputs from *C. elegans* cholinergic MNs to BWM

393 (Varshney et al., 2011; White et al., 1986), predominance is apparent in excitatory neuromuscular  
394 junctions from A- and B-type MNs to ventral muscles, as well as in the corresponding contralateral  
395 synapses to inhibitory DD MNs, which innervate dorsal muscle. Therefore, tonic activity of B- or A-  
396 type MNs would be expected to generate a bias towards ventral bending, and this could be balanced by  
397 excitation of AS MNs. In addition, VC neurons may contribute in counteracting AS MN function (see  
398 above). However, the compressed nature of the *C. elegans* nervous system, in which single neurons  
399 fulfill multiple tasks that in higher animals are executed by layers of different cells, may not always  
400 allow for the direct comparison to vertebrate systems.

401 The groups of forward (AVB, PVC) and backward PINs (AVA, AVD, AVE), respectively, are  
402 synchronized (Prevedel et al., 2014; Schrödel et al., 2013), inhibit each other and change their state  
403 stochastically (Pierce-Shimomura et al., 2008; Roberts et al., 2016). Despite anatomical prevalence of  
404 chemical synapses from AVA to AS MNs, our data showed larger AS MN effects after stimulation of  
405 the forward PIN AVB, and a stronger correlation of AS MN activity with forward locomotion.  
406 Recently, ability of MNs to modulate activity of PINs was shown in several animal models: for B-type  
407 MNs changing the inhibitory chemical transmission of AVB to AVA in *C. elegans* (Kawano et al.,  
408 2011; Liu et al., 2017); for MNs regulating the frequency of crawling in *Drosophila* (Matsunaga et al.,  
409 2017); for MNs affecting activity of the excitatory V2a neurons in zebrafish (Song et al., 2016); and, in  
410 the mouse, such activity was suggested for MNs, changing the frequency of rhythmic CPG activity  
411 after stimulation by rhodopsins (Falgairolle et al., 2017). Positive feedback from MNs required the  
412 function of gap junctions, coupling between MNs and PINs in all these systems. Our data suggest that  
413 AS MNs are more relevant during forward locomotion, and receive stronger inputs from the forward  
414 PIN AVB, while their electrical feedback is stronger to the backward PIN AVA. If the latter would  
415 provide inhibition in the context of the free moving animal, e.g. as an electrical sink for AVA, AS MN  
416 activity should exert a bias to promote the forward locomotion state.

#### 417 **AS MNs as CPGs?**

418 CPGs are dedicated neural circuits with intrinsic rhythmic activities (Grillner, 2006; Guertin, 2013). In  
419 many organisms including those showing undulatory movement (e.g. leech, lamprey), series of CPGs  
420 are distributed along the length of the body in locomotor neural circuits (Kristan et al., 2005; Mullins  
421 et al., 2011). In *C. elegans*, the bending wave can be generated even in the absence of all PINs (Gao et  
422 al., 2017; Kawano et al., 2011; Zheng et al., 1999) as well as in absence of GABAergic MNs  
423 (Donnelly et al., 2013; McIntire et al., 1993). The existence of series of CPGs in the *C. elegans* VNC  
424 was discussed for a long time, and single neurons or small groups of neurons were suggested (Cohen  
425 and Sanders, 2014; Zhen and Samuel, 2015). B-type MNs are able to propagate the bending wave  
426 posteriorly from a likely head CPG that generates head oscillations (Hendricks et al., 2012; Shen et al.,

427 2016), simply by proprioceptive coupling (Wen et al., 2012). Recently, pacemaker properties of the  
428 posterior A-type MN, DA9, were revealed during backward locomotion, that are based on the activity  
429 of a P/Q/N-type  $Ca^{2+}$  channel (Gao et al., 2017). Computational modelling of repeating units of the  
430 VNC, based on connectome data, identified a dorsally oriented sub-circuit consisting of AS, DA, and  
431 DB MNs, which could act as a potential CPG (Olivares et al., 2017).

### 432 **Potential gating properties of AS MNs**

433 Among PINs, AVB and AVA are most important for enabling forward and backward locomotion,  
434 respectively (Chalfie et al., 1985; Kato et al., 2015; Roberts et al., 2016). Bistable states with two  
435 distinct membrane potentials, i.e. up and down states, that ‘gate’ activity of the downstream target  
436 neurons, were shown for several interneurons including AVA and AVB (Gordus et al., 2015; Kato et  
437 al., 2015; Mellem et al., 2008). For MNs, bistability was inferred for the A-, B- and D- types of MNs  
438 from direct recordings (Liu et al., 2014) as well as from the graded responses in muscles,  
439 corresponding to shorter or longer activity bursts in MNs (Liu et al., 2017). Further, all-or-none  
440 responses in BWM cells, corresponding to spiking neurons as well as to mammalian skeletal muscles,  
441 that result from integrating graded excitatory and inhibitory input from MNs, were demonstrated (Gao  
442 and Zhen, 2011; Liu et al., 2011). AS MNs may similarly integrate inputs from forward and backward  
443 PINs, or themselves influence the PINs via UNC-7 and/or INX-3 gap junctions, to gate signal  
444 propagation in the VNC during forward locomotion, or to couple to A-type MN oscillators (DA9), via  
445 the AVA PIN during backward locomotion (Gao et al., 2017). In line with this hypothesis, we found  
446 ceasing of locomotion when AS MNs were hyperpolarized. The different AS MN responses to  
447 depolarization of AVB and AVA could represent biased activation, analogous to the imbalanced  
448 activities of A- and B-type MNs during forward and reverse locomotion (Kawano et al., 2011). Gating  
449 neurons that affect rhythmic properties of CPGs are also known for the leech locomotor circuit  
450 (Friesen and Kristan, 2007; Mullins et al., 2011; Taylor et al., 2000).

### 451 **Conclusions**

452 The previously uncharacterized class of AS motor neurons is specialized in coordination of dorso-  
453 ventral undulation bends during wave propagation, a feature maintained by asymmetry in both  
454 synaptic input and output. Moreover AS neurons integrate signals for forward and reverse locomotion  
455 from premotor interneurons and potentially gate ventral nerve cord CPGs via gap junctions.

456

457

458

## 459 **EXPERIMENTAL PROCEDURES**

### 460 **Strains and Genetics**

461 *C. elegans* strains were maintained under standard conditions on nematode growth medium (NGM) and fed by  
462 *E. coli* strain OP50-1 (Brenner, 1974). Transgenic lines were generated using standard procedures (Fire and  
463 Pelham, 1986) by injecting young adult hermaphrodites with the (plasmid-encoded) transgene of interest and a  
464 marker plasmid that expresses a fluorescent protein. In some cases, empty vector was included to increase the  
465 overall DNA concentration to 150-200 ng/μl.

466 The following strains were used or generated for this study: **N2** (wild type isolate, Bristol strain), **CB5**: *unc-*  
467 *7(e5)X*, **CB307**: *unc-47(e307)III*, **CZ16469**: *acr-2(n2420)X*; *juEx4768[psra-11::ChR2::yfp]* (Qi et al., 2013),  
468 **PD4665**: *wt*; *ccls4655[pes-10::GFP;dpy-20+]*, **RM2558**: *wt*; *Is[punc-17::GFP-NLS]*, **ZM5091**: *wt*;  
469 *hpIs190[pnmr-1(short2)-D3cpv; lin-15+]*, **ZM5089**: *unc-7(e5)X*; *hpIs190*, **ZM5132**: *wt*; *hpIs179[psra-11-*  
470 *D3cpv]*, **ZM5136**: *unc-7(e5)X*; *hpIs179* (all ZM strains are kind gift from Mei Zhen), **ZX460**: *wt*; *zxls6[punc-*  
471 *17::ChR2(H134R)::yfp; lin-15+]*V, **ZX499**: *wt*; *zxls5[punc-17::ChR2(H134R)::yfp; lin-15+]*X, **ZX1023**: *lite-*  
472 *1(ce314)X*; *zxls30[pflp-18::flox::ChR2mCherry::SL2::GFP; pgpa-14::nCre; lin-15+]*, **ZX1396**: *wt*;  
473 *zxls51[pmyo-3::RCaMP1h]*, **ZX2002**: *lite-1(ce314)X*; *zxls6*, **ZX2004**: *lite-1(ce314)X*; *zEx1016 [punc-*  
474 *4::ChR2\_RNAi<sub>sense</sub> & antisense pmyo-2::mCherry]*; *zEx1017[pacr-5::ChR2\_RNAi<sub>sense</sub> & antisense; pmyo-3::mCherry]*,  
475 **ZX2007**: *wt*; *zxls5*; *zEx1016*; *zEx1017*, **ZX2008**: *wt*; *zEx1023[punc-17::QF; pacr-5::QS::mCherry; punc-*  
476 *4::QS::mCherry; QUAS::ACR1::YFP; pmyo-2::mCherry]*, **ZX2011**: *wt*; *zEx1020[punc-17::QF; pacr-*  
477 *5::QS::mCherry; punc-4::QS::mCherry; QUAS::HisCl1::GFP; pmyo-2::mCherry]*, **ZX2012**: *lite-1(ce314)X*;  
478 *ccls4655[pes-10::GFP; dpy-20+]*; *zEx1021[punc-17::QF; pacr-5::QS::mCherry; punc-4::QS::mCherry;*  
479 *QUAS::GCaMP6::SL2::mCherry; pmyo-2::mCherry]*, **ZX2110**: *wt*; *mdIs[punc-17::GFP-NLS;]*  
480 *zEx1024[punc-17::QF; pacr-5::QS::mCherry; punc-4::QS::mCherry; QUAS::PH-miniSOG; pmyo-*  
481 *2::mCherry]*, **ZX2113**: *unc-47(e307)III*; *zEx1029[punc-17::QF; pacr-5::QS::mCherry; punc-*  
482 *4::QS::mCherry; QUAS::ACR1::YFP; pmyo-2::mCherry]*, **ZX2114**: *wt*; *zxls51*; *zEx1020*, **ZX2127**: *lite-*  
483 *1(ce314)X*; *zxls30*; *zEx1021*, **ZX2128**: *lite-1(ce314)X*; *juEx4768*; *zEx1021*, **ZX2132**: *wt*; *zxls5*; *zEx1016*,  
484 *zEx1017*; *zEx1028[pmyo-3::GCaMP3]*, **ZX2212**: *lite-1(ce314)X*; *hpIs179*; *zxls6*; *zEx1016*, *zEx1017* ,  
485 **ZX2213**: *lite-1(ce314)X*; *hpIs190*; *zxls6*; *zEx1016*, *zEx1017*, **ZX2217**: *unc-7(e5)X*; *hpIs190*; *zxls6*;  
486 *zEx1016*, *zEx1017*; **ZX2220**: *unc-7(e5)*; *hpIs179*; *zxls6*; *zEx1016*, *zEx1017*, **ZX2221**: *unc-7(e5)X*; *zxls6*;  
487 *zEx1016*, *zEx1017*

### 488 **Molecular biology**

489 We used the following promoters: 3.5-kb *punc-17* (Sieburth et al., 2005), 2.5 kb *punc-4* (Miller et al., 1992) and  
490 4.3 kb *pacr-5* (Winnier et al., 1999), genomic DNA sequence upstream of the ATG start codon of each gene,  
491 respectively. The *punc-4::ChR2* sense and antisense construct was generated as follows: The *punc-4* promoter  
492 from plasmid pCS139 was subcloned into pCS57 (Schultheis et al., 2011) by *SphI* and *NheI*, 1 kb antisense  
493 sequence was amplified from the ligated construct pOT1 *punc-4::ChR2::YFP* using primers (5'-  
494 GGGGTTTAAACAGCTAGCGTCGATCCATGG-3' and 5'-

495 CCCGCGGCCGCCAGCGTCTCGACCTCAATC-3') and subcloned into the same construct by *NotI* and  
496 *PmeI* to get pOT2. To silence ChR2 expression under the *pacr-5* promoter we used a sense and antisense strands  
497 approach (Esposito et al., 2007) as follows: The *pacr-5* promoter was amplified from genomic DNA using  
498 primers (5'-TTATGATGCGAAAGCTGAATCGAGAAAGAG-3', 5'-  
499 CCATGCTTACTGCACTTGCTTCCCATACTTC-3', nested 5'-  
500 GGGGCATGCATCGAGAAAGAGAAGCGGCG-3', 5'-CCCGCTAGCAAAGCATTGAAACTGGTGAC-3')  
501 and subcloned into pCS57 with *SphI* and *NheI* to yield pOT3 (*pacr-5*::ChR2::YFP). The sense and antisense  
502 strands were amplified from this construct using primers (for the coding region of ChR2: 5'-  
503 ATGGATTATGGAGGCGCCC-3', 5'-CCAGCGTCTCGACCTCAATC-3'; for the promoter sense: 5'-  
504 GCGGAGAGTAGTGTGTAGTG-3' and 5'-  
505 GGGGCCTCCATAATCCATCAAAGCATTGAAACTGGTGACGAG-3'; for the promoter antisense: 5'-  
506 GCGGAGAGTAGTGTGTAGTG-3' and 5'-  
507 GATTGAGGTCGAGACGCTGGCAAAGCATTGAAACTGGTGACGAG-3'; for fusion of sense strand: 5'-  
508 GCGGTTTCACGCTCTGATGAT-3' and 5'-CTCAGTGCCACCAATGTTCAA-3'; and for fusion of the  
509 antisense strand: 5'-GCGGTTTCACGCTCTGATGAT-3' and 5'-GCGCGAGCTGCTATTTGTAA-3').

510 The pOT6 *punc-17*::QF construct was generated as follows: QF::SL2::mCherry sequence was amplified from  
511 plasmid XW08 (a kind gift from Kang Shen and Xing Wei) using primers 5'-  
512 CAGGAGGACCCTTGGATGCCGCCTAAACGCAAGAC-3' and 5'-  
513 AGTAGAACTCAGTTTTCTGATGACAGCGGCCGATG-3', and subcloned into pCS57 (Schultheis et al.,  
514 2011) using In-Fusion cloning (Takara/Clontech). The SL2::mCherry fragment was cut out by *SalI* and *BbvCI*  
515 and 5'-overhangs were filled in with Klenow polymerase (NEB). The pOT8 *pacr-5*::QS::mCherry construct  
516 was generated by subcloning the *pacr-5* promoter from pOT3 into vector XW09 (Wei et al., 2012) (a gift from  
517 Kang Shen and Xing Wei) with *SphI* and *NheI*. The pOT7 *punc-4*::QS::mCherry construct was generated by  
518 subcloning the *punc-4* promoter from the pOT1 plasmid into XW09 vector with *SphI* and *NheI*. The pOT10  
519 pQUAS:: $\Delta$ pes-10::HisC11::GFP construct was generated by subcloning the sequence encoding HisC11::GFP  
520 from plasmid pNP403 (Pokala et al., 2014) (kind gift from Navin Pokala and Cori Bargmann) into the XW12  
521 vector (a gift from Kang Shen and Xing Wei) with *AscI* and *PspOMI*. The pOT11 pQUAS:: $\Delta$ pes-  
522 10::GCaMP6::SL2::mCherry construct was generated as follows: pQUAS:: $\Delta$ pes-10 sequence was amplified  
523 from plasmid XW12 using primers 5'-ACAGCTATGACCATGATTACGCCAAG-3' and 5'-  
524 CCCC GCGGCCGCCAATCCCGGGATCCTCTA-3', and subcloned into plasmid *plin-*  
525 *11*::GCaMP6::SL2::mCherry with *SphI* and *NotI*. The pOT13 pQUAS:: $\Delta$ pes-10::ACR1::YFP construct was  
526 generated as follows: ACR1::YFP sequence was amplified from plasmid pAB03 (*punc-17*::ACR1::YFP; Bergs  
527 et al. under revision) using primers 5'-CCCCGCGCGCCATCCATGAGCAGCATCACC-3' and 5'-  
528 CCCC GAATTCCTTACTTGTACAGCTCGTCCAT-3', and subcloned into vector XW12 with *AscI* and *EcoRI*.

529 Plasmid pOT17 (pQUAS:: $\Delta$ pes-10::PH-miniSOG(Q103L)) was generated as follows: PH-miniSOG(Q103L)  
530 sequence was amplified from plasmid pCZGY2849 (a gift from Andrew Chisholm: Addgene plasmid 74112)  
531 using primers 5'-CCCCGCGCGCCCTTCGGATCCAGATCTATGCAC-3' and 5'-



532 TGTACAAGAAAGCTGGGTCG-3') and subcloned into vector XW12 using *AscI* and *EcoRI* restriction sites.  
533 The construct details are available on request.

#### 534 **Animal tracking and behavioral analysis**

535 For worms moving freely on NGM, locomotion parameters were acquired with a previously described worm  
536 tracker (Stirman et al., 2011) allowing to precisely target illumination of identified segments of the worm body  
537 by a modified off-the-shelf liquid crystal display (LCD) projector, integrated with an inverted epifluorescence  
538 microscope. Light power was measured with a powermeter (PM100, Thorlabs, Newton, NY, USA) at the  
539 specimen focal plane. Animals used in all the optogenetics experiments were raised in the dark at 20°C on NGM  
540 plates with *E. coli* OP50-1 and all-*trans*-retinal. The OP50-retinal plates were prepared 1–2 days in advance by  
541 seeding a 6 cm NGM-agar plate with 250 µl of OP50 culture and 0.25 µl of 100 mM retinal dissolved in ethanol.  
542 Young adults were transferred individually on plain NGM plates under red light (>600 nm) in a dark room and  
543 kept for 5 minutes in the dark before transfer to the tracker.

544 For experiments with ChR2 depolarizing MNs (Figs. 1, 2, Supplementary Fig. S1), blue light of 470 nm and 1.8  
545 mW/mm<sup>2</sup> intensity was used with the following light protocol: 20 s 'dark' (referring to no blue light  
546 illumination) control, 20 s of illumination, followed again by 20 s dark. The animals' body was divided into 11  
547 segments, of which 3-10, 3-4, 5-6 or 9-10 were illuminated, depending on the experiment.

548 For optogenetic ablation experiments (Fig. 3A, Supplementary Fig. S2), AS MNs were ablated in animals  
549 expressing PH-miniSOG by 2.5 min exposure to 470 nm light of 1.8 mW/mm<sup>2</sup> intensity; segments 3-10 out of  
550 11 were illuminated. Animals were analyzed after a 2 h resting period for 60 s without illumination. Wild type  
551 worms were used as a control with the same illumination protocol. Ablation was verified by fluorescence  
552 microscopy in strain ZX2110 expressing green fluorescent protein (GFP) in all cholinergic neurons, in addition  
553 to PH-miniSOG in AS MNs.

554 For experiments of AS MN hyperpolarization using the histamine-gated Cl<sup>-</sup>-channel HisCl1 (Fig. 3B,  
555 Supplementary Fig. S2), worm locomotion was measured on NGM plates with 10 mM histamine 4 minutes after  
556 transfer from plates without histamine, for 60 s without illumination. The same strain on NGM without  
557 histamine served as a control.

558 For experiments in which MNs were hyperpolarized with natural Cl<sup>-</sup>-conducting anion channel rhodopsin  
559 (ACR1; Fig. 4), due to the high operational light sensitivity of the channel, the system was modified as  
560 described (Steuer Costa et al., 2017). An additional band pass filter (650 ± 25 nm) was inserted in the  
561 background light path and a mechanical shutter (Sutter Instrument Company, Novato, USA), synchronized to  
562 the light stimulation, was placed between projector and microscope. Control animals were tested for the  
563 background light stimulation and showed no response. The light stimulation protocol was 20 s without  
564 illumination, 20 s in 70 µW/mm<sup>2</sup> 470 nm light and 20 s without illumination. The worms' body was divided into  
565 11 segments, and segments 3-10, 3-4, 5-6 or 9-10 were illuminated, respectively. As the experiment in *unc-*  
566 *47(e307)* background was performed with a different transgene injected into *unc-47(e307)* mutants, we tested

567 the extrachromosomal array after outcrossing into wild type background, where it evoked contraction of the  
568 animals, as expected (Supplementary Fig. S3C).

569 Tracks were automatically filtered to exclude data points from erroneously evaluated movie frames with a  
570 custom-made workflow in KNIME (KNIME Desktop version 3.5, KNIME.com AG, Zurich, Switzerland;  
571 (Warr, 2012). Our constraints were that animals do not move faster than 1.25 mm/s and their length does not  
572 show a discrepancy above 25 % to the mean first five seconds of the video. Videos were excluded from analysis  
573 when more than 15 % of the data points had to be discarded by our constraints. Behavior data passed the  
574 Shapiro-Wilk normality test.

575 For determination of the ratio of dorso-/ventral angles (Fig. 1BIII, IV), the second out of 11 three point angles,  
576 measured from head to tail, was registered for animals for which the vulva position was previously indicated by  
577 manually indicating this to the software. For each track, values of the second three-point angle were averaged  
578 for dorsal and ventral bends individually, and the ratio was calculated.

579 To calculate the frame-to-frame difference of bending angles (Fig. 4E), data on each of eleven 3-point angles  
580 were extracted, smoothed by running an average of 15 frames, and the  $\Delta$  of absolute values between two  
581 subsequent frames were calculated and averaged for before and during illumination conditions for each angle.  
582 The light – no light  $\Delta \Delta$  of bending angles (Fig. 4F) were calculated by subtracting the value of the no light from  
583 the light condition. They were then averaged for the bending angles 1-5 (anterior) and 6-11 (posterior).

#### 584 **Body posture analysis**

585 Binarized videos of freely crawling animals were used to segment the animals' body, and analyzed as described  
586 earlier (Hums et al., 2016; Stephens et al., 2008), using a custom MATLAB script (MathWorks, Natick,  
587 Massachusetts). Briefly, grey scale worm images were binarized with a global image threshold using Otsu's  
588 method (Otsu, 1979). Objects encompassing border pixels were ignored and only the largest object was assumed  
589 to be the worm. The binary image was further processed (by thickening, removing spur pixels, flipping pixels  
590 by majority and filling holes). Worm skeletonization was achieved by thinning to produce an ordered vector of  
591 100 body points and corresponding tangent angles (theta) from head to tail. Images that could not be analyzed or  
592 where the skeleton of the animal was unusually small were considered as missing data points. Head and tail  
593 assignment was checked manually. The theta angles were smoothened by a simple moving average with a  
594 window of 15 centered data points. The mean of these angles was then compared to the Eigenworms computed  
595 from previously published data on N2 videos (Stephens et al., 2008). The Eigen projections obtained were taken  
596 as a measure of worm posture and plotted.

#### 597 **Electrophysiology**

598 Recordings from dissected dorsal BWM cells of strain ZX2221 (used to avoid unspecific excitation of AS MNs  
599 via PINs were conducted as described previously (Liewald et al., 2008). Only the left side of the worm was cut  
600 to preserve commissural connections from the ventral nerve cord where AS MN cell bodies reside. Light  
601 activation was performed using an LED lamp (KSL-70, Rapp OptoElektronik, Hamburg, Germany; 470 nm, 8

602 mW/mm<sup>2</sup>) and controlled by an EPC10 amplifier and Patchmaster software (HEKA, Germany).

### 603 **Ca<sup>2+</sup> imaging microscope setup**

604 Fluorescence measurements were carried out on an inverted fluorescence microscope (Axiovert 200, Zeiss,  
605 Germany) equipped with motorized stage MS 2000 (Applied Scientific Instrumentation, USA) and the  
606 PhotoTrack quadrant photomultiplier tube (PMT; Applied Scientific Instrumentation, USA). Two high-power  
607 light emitting diodes (LEDs; 470 and 590 nm wavelength, KSL 70, Rapp Optoelektronik, Germany) or a 100 W  
608 HBO mercury lamp were used as light sources. A Photometrics DualView- $\Lambda$  beam splitter was used to obtain  
609 simultaneous dual-wavelength acquisition; these were coupled to a Hamamatsu Orca Flash 4.0 sCMOS camera  
610 operated by HImage Live (Hamamatsu) or MicroManager (<http://micro-manager.org>). Light illumination  
611 protocols (temporal sequences) were programmed on, and generated by, a Lambda SC Smart shutter controller  
612 unit (Sutter Instruments, USA), using its TTL output to drive the LED power supply or to open a shutter when  
613 using the HBO lamp.

### 614 **Measurement of Ca<sup>2+</sup> in muscles and AS MNs in immobilized worms**

615 For measurements of GCaMP3 (Fig. 2) and RCaMP (Fig. 3B) in muscles and GCaMP6 in AS MNs (Figs. 5, 6),  
616 the following light settings were used: GFP/mCherry Dualband ET Filterset (F56-019, AHF Analysentechnik,  
617 Germany), was combined with 532/18 nm and 625/15 nm emission filters and a 565 longpass beamsplitter (F39-  
618 833, F39-624 and F48-567, respectively, all AHF). ChR2 stimulation was performed using 1.0-1.2 mW/mm<sup>2</sup>  
619 blue light, unless otherwise stated. To measure RCaMP or mCherry fluorescence, 590 nm, 0.6 mW/mm<sup>2</sup> yellow  
620 light was used. The 2x binned images were acquired at 50 ms exposure time and 20 fps. Animals were  
621 immobilized on 2 or 4% M9 agar pads with polystyrene beads (Polysciences, USA) and imaged by means of  
622 25x or 40x oil objective lenses. 5 s of yellow light illumination and 15 s of blue light illumination protocols  
623 were used. For RCaMP imaging 20 s yellow light illuminations were used. Measurements of control animals  
624 (i.e. raised without ATR, or without histamine) were conducted the same way as for animals kept in the  
625 presence of ATR, or exposed to histamine.

626 Image analysis was performed in ImageJ (NIH). For Ca<sup>2+</sup>-imaging in muscles, regions of interest (ROIs) were  
627 selected for half of the BWM cells in the field of view, or around the neuron of interest for Ca<sup>2+</sup>-imaging in AS  
628 MNs. Separate ROIs were selected for background fluorescence with the same size. Mean intensity values for  
629 each video frame were obtained and background fluorescence values were subtracted from the fluorescence  
630 values derived for GCaMP or RCaMP. Subtracted data was normalized to  $\Delta F/F = (F_i - F)/F$ , where  $F_i$  represents  
631 the intensity at the given time point and  $F$  represents the average fluorescence of the entire trace.

### 632 **Measurement of Ca<sup>2+</sup> in muscles and AS motor neurons in moving animals**

633 Measurements of GCaMP6 and mCherry were performed using the same filter and microscope settings as for  
634 immobilized worms. Moving worms were assayed on 1% agar pads in M9 buffer. Tracking was based on the  
635 PhotoTrack system (Applied Scientific Instrumentation, USA) that uses the signals from a 4-quadrant  
636 photomultiplier tube (PMT) sensor for automated repositioning of a motorized XY stage to keep a moving

637 fluorescent marker signal in the field of view (Faumont et al., 2011). For this purpose, an oblique 80%  
638 transmission filter was inserted in the light path to divert 20% of the light to the PMT quadrants. A 535/30  
639 bandpass filter (F47-535, AHF) was used to narrow the emission spectrum prior to detection for improved  
640 tracking performance. A fluorescent marker GFP was expressed in vulval muscle cells, strains PD4665 and  
641 ZX2012. Video files containing data of both fluorescent channels (for GCaMP6 and mCherry) were processed  
642 with custom written Wolfram Mathematica notebooks. Both color channels were virtually overlaid to accurately  
643 correct the spatial alignment. Images were first binarized to identify the centroid of the moving neuronal cell  
644 bodies throughout all frames. Mean intensity values of a circular ROI (18 pixel radius) centered on this centroid  
645 were measured and subtracted with the mean intensity values of a surrounding donut shaped background ROI (5  
646 pixel width). Coordinates of two AS neurons of interest were recorded relative to the vulva and to each other to  
647 obtain their relative distance and the angle between the vulva and the two neurons of interest. The traces were  
648 normalized to  $\Delta F/F = (F_i - F)/F$ , where F represents the average of the entire trace, and were used for correlation  
649 analysis.

#### 650 **Measurement of Ca<sup>2+</sup> signals in PINs**

651 Ca<sup>2+</sup> imaging with cameleon D3cpv (Palmer et al., 2006) was performed on 5% agar pads as described (Kawano  
652 et al., 2011) on an Axiovert 200 microscope (Zeiss), using a 100x/1.30 EC Plan-Neofluar Oil M27 oil  
653 immersion objective. ChR2 stimulation was performed using 8 mW/mm<sup>2</sup> blue light delivered by a 100 W HBO  
654 mercury lamp. The excitation light path was split using a dual-view (Photometrics) beam splitter with a  
655 CFP/YFP filter set. The YFP/CFP ratio after background subtraction was normalized to the  $\Delta R/R = (R_i - R)/R$ ,  
656 where R<sub>i</sub> represents the YFP/CFP ratio at the given time point and R represents the average of the entire trace  
657 during blue light stimulation. YFP/CFP ratios without normalization were used for quantification and statistics  
658 (Figure 6B IV). This data did not pass the Shapiro-Wilk normality test.

#### 659 **Correlation analysis**

660 Cross-correlation analyses were performed with built-in MATLAB functions. Ca<sup>2+</sup> transients in AS6 and AS7  
661 and vulva angles were smoothed for 10 frames. Individual bending events identified as segment of the trace  
662 between two minima were used for cross-correlation with 100 time lags (10□s). For comparison of peak  
663 correlations, the maximum correlation (positive or negative) in a 5 s time window centered on the peak of the  
664 control mean correlation was used.

#### 665 **Statistics**

666 Data is given as means ± SEM. Significance between data sets after two-tailed Student's t-test or after Mann-  
667 Whitney U-test or after ANOVA is given as p-value (\* p ≤ 0.05; \*\* p ≤ 0.01; \*\*\* p ≤ 0.001), the latter was given  
668 following Tukey's post-hoc test. Data was analyzed and plotted in Excel (Microsoft, USA), in OriginPro 2016  
669 (OriginLab Corporation, Northampton, USA) or in MATLAB (MathWorks, Natick, Massachusetts, USA).

670

671 **REFERENCES**

- 672 Akerboom, J., Carreras Calderón, N., Tian, L., Wabnig, S., Prigge, M., Tolö, J., Gordus, A., Orger, M.B., Severi, K.E.,  
673 Macklin, J.J., et al. (2013). Genetically encoded calcium indicators for multi-color neural activity imaging and combination  
674 with optogenetics. *Front. Mol. Neurosci.* 6, 1–29.
- 675 Altun, Z.F., Chen, B., Wang, Z.-W., and Hall, D.H. (2009). High Resolution Map of *Caenorhabditis elegans* Gap Junction  
676 Proteins. *Dev. Dyn.* 238, 1936–1950.
- 677 Brenner, S. (1974). The genetics of *Caenorhabditis elegans*. *Genetics* 77, 71–94.
- 678 Butler, V.J., Branicky, R., Yemini, E., Liewald, J.F., Gottschalk, A., Kerr, R.A., Chklovskii, D.B., and Schafer, W.R.  
679 (2014). A consistent muscle activation strategy underlies crawling and swimming in *Caenorhabditis elegans*. *J. R. Soc.*  
680 *Interface* 12, 201409, 1–12.
- 681 Chalfie, M., Sulston, J.E., White, J.G., Southgate, E., Thomson, J.N., Brenner, S., and White, G. (1985). The neural circuit  
682 for touch sensitivity in *Caenorhabditis elegans*. *J. Neurosci.* 5, 956–964.
- 683 Chen, B.L., Hall, D.H., and Chklovskii, D.B. (2006). Wiring optimization can relate neuronal structure and function. *Proc.*  
684 *Natl. Acad. Sci. U. S. A.* 103, 4723–4728.
- 685 Chronis, N., Zimmer, M., and Bargmann, C.I. (2007). Microfluidics for in vivo imaging of neuronal and behavioral activity  
686 in *Caenorhabditis elegans*. *Nat. Methods* 4, 727–731.
- 687 Cohen, N., and Sanders, T. (2014). Nematode locomotion: dissecting the neuronal-environmental loop. *Curr. Opin.*  
688 *Neurobiol.* 25, 99–106.
- 689 Deliagina, T.G., Zelenin, P. V, Fagerstedt, P., Grillner, S., and Orlovsky, G.N. (2000). Activity of reticulospinal neurons  
690 during locomotion in the freely behaving lamprey. *J. Neurophysiol.* 83, 853–863.
- 691 Donnelly, J.L., Clark, C.M., Leifer, A.M., Piri, J.K., Haburcak, M., Francis, M.M., Samuel, A.D.T., and Alkema, M.J.  
692 (2013). Monoaminergic orchestration of motor programs in a complex *C. elegans* behavior. *PLoS Biol.* 11, e1001529.
- 693 Esposito, G., Di Schiavi, E., Bergamasco, C., and Bazzicalupo, P. (2007). Efficient and cell specific knock-down of gene  
694 function in targeted *C. elegans* neurons. *Gene* 395, 170–176.
- 695 Falgairolle, M., Puhl, J.G., Pujala, A., Liu, W., and O’Donovan, M.J. (2017). Motoneurons regulate the central pattern  
696 generator during drug-induced locomotor-like activity in the neonatal mouse. *Elife* 6, 1–29.
- 697 Fang-Yen, C., Alkema, M.J., and Samuel, A.D.T. (2015). Illuminating neural circuits and behaviour in *Caenorhabditis*  
698 *elegans* with optogenetics. *Philos. Trans. R. Soc. B Biol. Sci.* 370, 20140212.
- 699 Faumont, S., Rondeau, G., Thiele, T.R., Lawton, K.J., McCormick, K.E., Sottile, M., Griesbeck, O., Heckscher, E.S.,  
700 Roberts, W.M., Doe, C.Q., et al. (2011). An Image-Free Opto-Mechanical system for creating virtual environments and  
701 imaging neuronal activity in freely moving *caenorhabditis elegans*. *PLoS One* 6, 1–12.
- 702 Fidelin, K., Djenoune, L., Stokes, C., Prendergast, A., Gomez, J., Baradel, A., Del Bene, F., and Wyart, C. (2015). State-  
703 dependent modulation of locomotion by GABAergic spinal sensory neurons. *Curr. Biol.* 25, 3035–3047.
- 704 Fire, A., and Pelham, H. (1986). Integrative transformation of *Caenorhabditis elegans*. *EMBO J.* 5, 2673–2680.
- 705 Friesen, W.O., and Kristan, W.B. (2007). Leech locomotion: swimming, crawling, and decisions. *Curr. Opin. Neurobiol.*  
706 17, 704–711.
- 707 Gao, S., and Zhen, M. (2011). Action potentials drive body wall muscle contractions in *Caenorhabditis elegans*. *Proc. Natl.*  
708 *Acad. Sci. U. S. A.* 108, 2557–2562.
- 709 Gao, S., Guan, S.A., Fouad, A.D., Meng, J., Huang, Y.-C., Li, Y., Alcaire, S.A., Hung, W., Kawano, T., Lu, Y., et al.  
710 (2017). Excitatory Motor Neurons are Local Central Pattern Generators in an Anatomically Compressed Motor Circuit for  
711 Reverse Locomotion. *bioRxiv in press*, 1–32.
- 712 Gjorgjieva, J., Biron, D., and Haspel, G. (2014). Neurobiology of *Caenorhabditis elegans* locomotion: Where do we stand?  
713 *Bioscience* 64, 476–486.
- 714 Gordus, A., Pokala, N., Levy, S., Flavell, S.W., and Bargmann, C.I. (2015). Feedback from Network States Generates  
715 Variability in a Probabilistic Olfactory Circuit. *Cell* 161, 215–227.
- 716 Goulding, M. (2009). Direction. *Circuits Control. Vertebr. Locomot.* 10, 507–518.

- 717 Grillner, S. (2006). Biological pattern generation: the cellular and computational logic of networks in motion. *Neuron* 52,  
718 751–766.
- 719 Grillner, S., and Wallén, P. (2002). Cellular bases of a vertebrate locomotor system - Steering, intersegmental and  
720 segmental co-ordination and sensory control. *Brain Res. Rev.* 40, 92–106.
- 721 Guertin, P.A. (2013). Central pattern generator for locomotion: Anatomical, physiological, and pathophysiological  
722 considerations. *Front. Neurol.* 3, 1–15.
- 723 Haspel, G., and O'Donovan, M.J. (2011). A perimotor framework reveals functional segmentation in the motoneuronal  
724 network controlling locomotion in *Caenorhabditis elegans*. *J. Neurosci.* 31, 14611–14623.
- 725 Haspel, G., O'Donovan, M.J., and Hart, A.C. (2010). Motoneurons dedicated to either forward or backward locomotion in  
726 the nematode *Caenorhabditis elegans*. *J. Neurosci.* 30, 11151–11156.
- 727 Hendricks, M., Ha, H., Maffey, N., and Zhang, Y. (2012). Compartmentalized calcium dynamics in a *C. elegans*  
728 interneuron encode head movement. *Nature* 487, 99–103.
- 729 Hums, I., Riedl, J., Mende, F., Kato, S., Kaplan, H.S., Latham, R., Sonntag, M., Traunmüller, L., and Zimmer, M. (2016).  
730 Regulation of two motor patterns enables the gradual adjustment of locomotion strategy in *Caenorhabditis elegans*. *Elife* 5,  
731 1–36.
- 732 Husson, S.J., Steuer Costa, W., Schmitt, C., and Gottschalk, A. (2012). Keeping track of worm trackers. *WormBook* 1–17.
- 733 Husson, S.J., Gottschalk, A., and Leifer, A.M. (2013). Optogenetic manipulation of neural activity in *C. elegans*: From  
734 synapse to circuits and behaviour. *Biol. Cell* 105, 235–250.
- 735 Iino, Y., and Yoshida, K. (2009). Parallel Use of Two Behavioral Mechanisms for Chemotaxis in *Caenorhabditis elegans*.  
736 *J. Neurosci.* 29, 5370–5380.
- 737 Kato, S., Kaplan, H.S., Schrödel, T., Skora, S., Lindsay, T.H., Yemini, E., Lockery, S., and Zimmer, M. (2015). Global  
738 Brain Dynamics Embed the Motor Command Sequence of *Caenorhabditis elegans*. *Cell* 163, 656–669.
- 739 Kawano, T., Po, M.D., Gao, S., Leung, G., Ryu, W.S., and Zhen, M. (2011). An imbalancing act: Gap junctions reduce the  
740 backward motor circuit activity to bias *C. elegans* for forward locomotion. *Neuron* 72, 572–586.
- 741 Kiehn, O. (2011). Development and functional organization of spinal locomotor circuits. *Curr. Opin. Neurobiol.* 21, 100–  
742 109.
- 743 Kiehn, O. (2016). Decoding the organization of spinal circuits that control locomotion. *Nat. Rev. Neurosci.* 17, 224–238.
- 744 Kiehn, O., Dougherty, K.J., Hägglund, M., Borgius, L., Talpalar, A., and Restrepo, C.E. (2010). Probing spinal circuits  
745 controlling walking in mammals. *Biochem. Biophys. Res. Commun.* 396, 11–18.
- 746 Kristan, W.B., Calabrese, R.L., and Friesen, W.O. (2005). Neuronal control of leech behavior. *Prog. Neurobiol.* 76, 279–  
747 327.
- 748 Leifer, A.M., Fang-Yen, C., Gershow, M., Alkema, M.J., and Samuel, A.D.T. (2011). Optogenetic manipulation of neural  
749 activity in freely moving *Caenorhabditis elegans*. *Nat. Methods* 8, 147–152.
- 750 Liewald, J.F., Brauner, M., Stephens, G.J., Bouhours, M., Schultheis, C., Zhen, M., and Gottschalk, A. (2008). Optogenetic  
751 analysis of synaptic function. *Nat. Methods* 5, 895–902.
- 752 Liu, P., Ge, Q., Chen, B., Salkoff, L., Kotlikoff, M.I., Wang, Z.-W., and Wang, Z.-W. (2011). Genetic dissection of ion  
753 currents underlying all-or-none action potentials in *C. elegans* body-wall muscle cells. *J. Physiol.* 58911, 101–117.
- 754 Liu, P., Chen, B., and Wang, Z.-W. (2014). SLO-2 potassium channel is an important regulator of neurotransmitter release  
755 in *Caenorhabditis elegans*. *Nat. Commun.* 5, 5155.
- 756 Liu, P., Chen, B., Mailler, R., and Wang, Z.-W. (2017). Antidromic-rectifying gap junctions amplify chemical transmission  
757 at functionally mixed electrical-chemical synapses. *Nat. Commun.* 8, 14818.
- 758 Liu, Q., Höllopeter, G., and Jørgensen, E.M. (2009). Graded synaptic transmission at the *Caenorhabditis elegans*  
759 neuromuscular junction. *Proc. Natl. Acad. Sci. U. S. A.* 106, 10823–10828.
- 760 Machado, T.A., Pnevmatikakis, E., Paninski, L., Jessell, T.M., and Miri, A. (2015). Primacy of Flexor Locomotor Pattern  
761 Revealed by Ancestral Reversion of Motor Neuron Identity. *Cell* 162, 338–350.
- 762 Marder, E., Bucher, D., Schulz, D.J., and Taylor, A.L. (2005). Invertebrate central pattern generation moves along. *Curr.*

- 763 Biol. 15, R685-99.
- 764 Matsunaga, T., Kohsaka, H., Nose, A., Goodman, C.S., Looger, L., Budnik, V., Griffith, L., Wyman, R.J., and Lee, T.  
765 (2017). Gap junction-mediated signaling from motor neurons regulates motor generation in the central circuits of larval  
766 *Drosophila*. *J. Neurosci.* 37, 2045–2060.
- 767 McIntire, S.L., Jorgensen, E., Kaplan, J., and Horvitz, H.R. (1993). The GABAergic nervous system of *Caenorhabditis*  
768 *elegans*. *Nature* 364, 337–341.
- 769 Mellem, J.E., Brockie, P.J., Madsen, D.M., and Maricq, A. V (2008). Action potentials contribute to neuronal signaling in  
770 *C. elegans*. *Nat. Neurosci.* 11, 865–867.
- 771 Miller, D.M., Shen, M.M., Shamu, C.E., Bürglin, T.R., Ruvkun, G., Dubois, M.L., Ghee, M., and Wilson, L. (1992). *C.*  
772 *elegans unc-4* gene encodes a homeodomain protein that determines the pattern of synaptic input to specific motor neurons.  
773 *Nature* 355, 841–845.
- 774 Miyawaki, A., Llopis, J., Heim, R., McCaffery, J.M., Adams, J. a, Ikura, M., and Tsien, R.Y. (1997). Fluorescent indicators  
775 for Ca<sup>2+</sup> based on green fluorescent proteins and calmodulin. *Nature* 388, 882–887.
- 776 Mullins, O.J., Hackett, J.T., Buchanan, J.T., and Friesen, W.O. (2011). Neuronal control of swimming behavior:  
777 comparison of vertebrate and invertebrate model systems. *Prog. Neurobiol.* 93, 244–269.
- 778 Nagel, G., Brauner, M., Liewald, J.F., Adeishvili, N., Bamberg, E., and Gottschalk, A. (2005). Light activation of  
779 Channelrhodopsin-2 in excitable cells of *caenorhabditis elegans* triggers rapid behavioral responses. *Curr. Biol.* 15, 2279–  
780 2284.
- 781 Olivares, E., Izquierdo, E.J., and Beer, R.D. (2017). A ventral nerve cord CPG may underlie locomotion in *C. elegans*.  
782 arXiv1705.02301v2 [Q-bio.NC] 18 June 2017.
- 783 Otsu, N. (1979). A Threshold Selection Method from Gray-Level Histograms. *IEEE Trans. Syst. Man. Cybern.* 9, 62–66.
- 784 Palmer, A.E., Giacomello, M., Kortemme, T., Hires, S.A., Lev-Ram, V., Baker, D., and Tsien, R.Y. (2006). Ca<sup>2+</sup>  
785 Indicators Based on Computationally Redesigned Calmodulin-Peptide Pairs. *Chem. Biol.* 13, 521–530.
- 786 Pearson, K.G. (1993). Common principles of motor control in vertebrates and invertebrates. *Annu. Rev. Neurosci.* 16, 265–  
787 297.
- 788 Pierce-Shimomura, J.T., Chen, B.L., Mun, J.J., Ho, R., Sarkis, R., and McIntire, S.L. (2008). Genetic analysis of crawling  
789 and swimming locomotory patterns in *C. elegans*. *Proc. Natl. Acad. Sci. U.S.A.* 105, 20982–20987.
- 790 Piggott, B.J., Liu, J., Feng, Z., Wescott, S. a, and Xu, X.Z.S. (2011). The neural circuits and synaptic mechanisms  
791 underlying motor initiation in *C. elegans*. *Cell* 147, 922–933.
- 792 Pokala, N., Liu, Q., Gordus, A., and Bargmann, C.I. (2014). Inducible and titratable silencing of *Caenorhabditis elegans*  
793 neurons in vivo with histamine-gated chloride channels. *Proc. Natl. Acad. Sci. U.S.A.* 111, 2770–2775.
- 794 Prevedel, R., Yoon, Y.-G., Hoffmann, M., Pak, N., Wetzstein, G., Kato, S., Schrödel, T., Raskar, R., Zimmer, M., Boyden,  
795 E.S., et al. (2014). Simultaneous whole-animal 3D imaging of neuronal activity using light-field microscopy. *Nat. Methods*  
796 11, 727–730.
- 797 Qi, Y.B., Po, M.D., Mac, P., Kawano, T., Jorgensen, E.M., Zhen, M., and Jin, Y. (2013). Hyperactivation of B-type motor  
798 neurons results in aberrant synchrony of the *Caenorhabditis elegans* motor circuit. *J. Neurosci.* 33, 5319–5325.
- 799 Roberts, W.M., Augustine, S.B., Lawton, K.J., Lindsay, T.H., Thiele, T.R., Izquierdo, E.J., Faumont, S., Lindsay, R.A.,  
800 Britton, M.C., Pokala, N., et al. (2016). A stochastic neuronal model predicts random search behaviors at multiple spatial  
801 scales in *C. elegans*. *Elife* 5, 1–41.
- 802 Rybak, I.A., Dougherty, K.J., and Shevtsova, N.A. (2015). Organization of the mammalian locomotor CPG: Review of  
803 computational model and circuit architectures based on genetically identified spinal interneurons. *eNeuro* 2, 1–21.
- 804 Schmitt, C., Schultheis, C., Pokala N., Husson, S.J., Liewald, J.F., Bargmann, C.I., and Gottschalk, A. (2012). Specific  
805 Expression of Channelrhodopsin-2 in Single Neurons of *Caenorhabditis elegans*. *PLoS One* 7, e43164.
- 806 Schrödel, T., Prevedel, R., Aumayr, K., Zimmer, M., and Vaziri, A. (2013). Brain-wide 3D imaging of neuronal activity in  
807 *Caenorhabditis elegans* with sculpted light. *Nat. Methods* 10, 1013–1020.
- 808 Schultheis, C., Liewald, J.F., Bamberg, E., Nagel, G., and Gottschalk, A. (2011). Optogenetic long-term manipulation of  
809 behavior and animal development. *PLoS One* 6, 1–9.

- 810 Selverston, A.I. (2010). Invertebrate central pattern generator circuits. *Philos. Trans. R. Soc. Lond. B. Biol. Sci.* 365, 2329–  
811 2345.
- 812 Shen, Y., Wen, Q., Liu, H., Zhong, C., Qin, Y., Harris, G., Kawano, T., Wu, M., Xu, T., Samuel, A.D., et al. (2016). An  
813 extrasynaptic GABAergic signal modulates a pattern of forward movement in *Caenorhabditis elegans*. *Elife* 5, 1–25.
- 814 Sieburth, D., Ch'ng, Q., Dybbs, M., Tavazoie, M., Kennedy, S., Wang, D., Dupuy, D., Rual, J.F., Hill, D.E., Vidal, M., et  
815 al. (2005). Systematic analysis of genes required for synapse structure and function. *Nature* 436, 510–516.
- 816 Sineshchekov, O.A., Govorunova, E.G., Li, H., and Spudich, J.L. (2015). Gating mechanisms of a natural anion  
817 channelrhodopsin. *Proc. Natl. Acad. Sci. U.S.A.* 112, 14236–14241.
- 818 Sirota, M.G., Di Prisco, G.V., and Dubuc, R. (2000). Stimulation of the mesencephalic locomotor region elicits controlled  
819 swimming in semi-intact lampreys. *Eur. J. Neurosci.* 12, 4081–4092.
- 820 Song, J., Ampatzis, K., Björnfors, E.R., and El Manira, A. (2016). Motor neurons control locomotor circuit function  
821 retrogradely via gap junctions. *Nature* 529, 1–5.
- 822 Speese, S., Petrie, M., Schuske, K., Ailion, M., Ann, K., Iwasaki, K., Jorgensen, E.M., and Martin, T.F.J. (2007). UNC-31  
823 (CAPS) is required for dense-core vesicle but not synaptic vesicle exocytosis in *Caenorhabditis elegans*. *J. Neurosci.* 27,  
824 6150–6162.
- 825 Starich, T. a, Xu, J., Skerrett, I.M., Nicholson, B.J., and Shaw, J.E. (2009). Interactions between innexins UNC-7 and  
826 UNC-9 mediate electrical synapse specificity in the *Caenorhabditis elegans* locomotory nervous system. *Neural Dev.* 4, 16.
- 827 Stephens, G.J., Johnson-Kerner, B., Bialek, W., and Ryu, W.S. (2008). Dimensionality and dynamics in the behavior of *C.*  
828 *elegans*. *PLoS Comput. Biol.* 4, 1–10.
- 829 Von Stetina, S.E., Treinin, M., and Miller, D.M. (2005). The motor circuit. *Int. Rev. Neurobiol.* 69, 125–167.
- 830 Steuer Costa, W., Yu, S. chieh, Liewald, J.F., and Gottschalk, A. (2017). Fast cAMP Modulation of Neurotransmission via  
831 Neuropeptide Signals and Vesicle Loading. *Curr. Biol.* 27, 495–507.
- 832 Stirman, J.N., Crane, M.M., Husson, S.J., Wabnig, S., Schultheis, C., Gottschalk, A., and Lu, H. (2011). Real-time  
833 multimodal optical control of neurons and muscles in freely behaving *Caenorhabditis elegans*. *Nat. Methods* 8, 153–158.
- 834 Stirman, J.N., Crane, M.M., Husson, S.J., Gottschalk, A., and Lu, H. (2012). A multispectral optical illumination system  
835 with precise spatiotemporal control for the manipulation of optogenetic reagents. *Nat. Protoc.* 7, 207–220.
- 836 Taylor, A., Cottrell, G.W., and Kristan, W.B. (2000). A model of the leech segmental swim central pattern generator.  
837 *Neurocomputing* 32–33, 573–584.
- 838 Varshney, L.R., Chen, B.L., Paniagua, E., Hall, D.H., and Chklovskii, D.B. (2011). Structural properties of the  
839 *Caenorhabditis elegans* neuronal network. *PLoS Comput. Biol.* 7, 1–21.
- 840 Warr, W.A. (2012). Scientific workflow systems: Pipeline Pilot and KNIME. *J. Comput. Aided. Mol. Des.* 26, 801–804.
- 841 Wei, X., Potter, C.J., Luo, L., and Shen, K. (2012). Controlling gene expression with the Q repressible binary expression  
842 system in *Caenorhabditis elegans*. *Nat. Methods* 9, 391–395.
- 843 Wen, Q., Po, M.D., Hulme, E., Chen, S., Liu, X., Kwok, S.W., Gershow, M., Leifer, A.M., Butler, V., Fang-Yen, C., et al.  
844 (2012). Proprioceptive Coupling within Motor Neurons Drives *C. elegans* Forward Locomotion. *Neuron* 76, 750–761.
- 845 White, J.G., Southgate, E., Thomson, J.N., and Brenner, S. (1986). The Mind of a Worm. *Philos. Trans. R. Soc. Lond. B.*  
846 *Biol. Sci.* 314, 1–340.
- 847 Wicks, S.R., Roehrig, C.J., and Rankin, C.H. (1996). A dynamic network simulation of the nematode tap withdrawal  
848 circuit: predictions concerning synaptic function using behavioral criteria. *J. Neurosci.* 16, 4017–4031.
- 849 Winnier, a. R., Meir, J.Y.-J., Ross, J.M., Tavernarakis, N., Driscoll, M., Ishihara, T., Katsura, I., and Miller, D.M. (1999).  
850 UNC-4/UNC-37-dependent repression of motor neuron-specific genes controls synaptic choice in *Caenorhabditis elegans*.  
851 *Genes Dev.* 13, 2774–2786.
- 852 Xu, S., and Chisholm, A.D. (2016). Highly efficient optogenetic cell ablation in *C. elegans* using membrane-targeted  
853 miniSOG. *Sci. Rep.* 6, 21271.
- 854 Yan, G., Vértés, P.E., Towilson, E.K., Chew, Y.L., Walker, D.S., Schafer, W.R., and Barabási, A.-L. (2017). Network  
855 control principles predict neuron function in the *Caenorhabditis elegans* connectome. *Nature* 550, 519–523.



- 856 Zhang, F., Wang, L.-P., Brauner, M., Liewald, J.F., Kay, K., Watzke, N., Wood, P.G., Bamberg, E., Nagel, G., Gottschalk,  
857 A., et al. (2007). Multimodal fast optical interrogation of neural circuitry. *Nature* 446, 633–639.
- 858 Zhen, M., and Samuel, A.D. (2015). *C. elegans* locomotion: small circuits, complex functions. *Curr. Opin. Neurobiol.* 33,  
859 117–126.
- 860 Zheng, Y., Brockie, P.J., Mellem, J.E., Madsen, D.M., and Maricq, A. V (1999). Neuronal control of locomotion in *C.*  
861 *elegans* is modified by a dominant mutation in the GLR-1 ionotropic glutamate receptor. *Neuron* 24, 347–361.

862

## 863 **AUTHOR CONTRIBUTIONS**

864 O.T. designed experiments, performed experiments, analyzed data, wrote the manuscript; P.V.d.A.  
865 performed experiments and provided analysis code; A.B. provided plasmids. T. G. and O. B. generated  
866 plasmids and strains and performed initial experiments. W.S.C provided analysis code and contributed  
867 to data analysis. J.F.L. performed experiments and analyzed data; A.G. supervised the project,  
868 designed experiments, performed data interpretation, and edited the manuscript.

869

## 870 **ACKNOWLEDGEMENTS**

871 We thank Cori Bargmann for suggesting to study the AS MNs. We are grateful to Mei Zhen, Kang  
872 Shen, Xing Wei, Navin Pokala, Cori Bargmann, Yishi Jin, and Andrew Chisholm for reagents and to  
873 Isabell Franz, Mona Hoeret, Heike Fettermann, Regina Wagner and Heinz Schewe for expert technical  
874 assistance. Yongmin Cho, Daniel Porto and Hang Lu provided equipment and software. We thank Gal  
875 Haspel for fruitful discussions. This work was funded by a GO-IN stipend of Goethe University, in  
876 conjunction with the EU program PCOFUND-GA-2011-291776, GO-IN (to O.T.), by a IMPReS PhD  
877 stipend (to A.B.) and by grants GO1011/4-2 (Protein-based Photoswitches), GO1011/8-1  
878 (NewOptogeneticsTools) and EXC115/3 (Cluster of Excellence Frankfurt - Macromolecular  
879 Complexes) from the Deutsche Forschungsgemeinschaft (DFG) to AG.

## 880 **FIGURE LEGENDS**

881 **Figure 1: Specific photodepolarization of AS MNs via Chr2 leads to body contraction, increased bending**  
882 **angles and reduced speed in freely moving *C. elegans*:** A) ‘Subtractive’ expression and illumination strategy  
883 to achieve specific stimulation of AS MNs by optogenetic tools: I) Silencing of optogenetic tool protein  
884 expression in the non-target subsets of MNs by dsRNA; II) Using the Q system for conditional expression. The  
885 transcriptional activator QF binds to the QUAS sequence to induce optogenetic tool expression. The  
886 transcriptional inhibitor QS suppresses expression in unwanted cells by binding to QF; III) Selective  
887 illumination of the VNC MNs by 470 nm blue light. The body of the worm was divided into 11 segments, of  
888 which 3-10 were illuminated in animals moving freely on agar plates. **B)** Expression pattern of  
889 Chr2(H134R)::YFP in AS MNs by the dsRNA subtractive approach; scale bar, 20  $\mu$ m. **C)** Representative body  
890 postures kymograph (20 s) of normalized 2-point angles of a 100-point spine, calculated from head to tail of the  
891 animal. Positive and negative curvature is represented by blue and red color. Animal expressed Chr2 in AS  
892 MNs as in A I and was illuminated after 10 s as in A III. Blue bar, period of 470 nm illumination. **D)**  
893 Photodepolarization of AS MNs by Chr2 (in animals raised with ATR): I, II) Locomotion speed: Mean  $\pm$  SEM  
894 crawling speed of animals before and during blue illumination (blue bar), comparing animals expressing Chr2  
895 in AS MNs or in all types of cholinergic MNs in the VNC, raised in the presence or absence of ATR (II: Group  
896 data of mean speed of the animals before (15-20 s) and during (21-26 s) Chr2 photoactivation); III, IV) Mean  $\pm$   
897 SEM body length of the animals shown in I (IV: Group data of the mean length before (15-20 s) and during (21-  
898 26 s) photoactivation). **E)** Depolarization of subsets of AS MNs in body segments. I) Scheme of anterior,  
899 midbody and posterior segmental illumination; II) Representative body posture kymographs of 2-point angles  
900 from head to tail before (20 s) and during Chr2 photoactivation by blue light in the segments of the worm body,  
901 corresponding to experiments as in E I). See also Supplementary Video S1 and Supplementary Figure S1B. P  
902 values \*  $\leq$  0.05; \*\*  $\leq$  0.01; \*\*\*  $\leq$  0.001. Number of animals is indicated in D. Statistical test in D II and IV:  
903 ANOVA with Tukey’s post hoc test.

904 **Figure 2. Photodepolarization of AS MNs causes activation of dorsal and simultaneous inhibition of**  
905 **ventral BWMs, and a dorsal bias in freely crawling animals.** A) I) AS MNs expressing Chr2 are illuminated  
906 by 470 nm blue light, Ca<sup>2+</sup> signal is recorded in the BWM expressing GCaMP3 (arrows, chemical synapses). II)  
907 Upper panel: Representative snapshots of Ca<sup>2+</sup> signals in BWM cells during blue light illumination in animals  
908 cultivated with and without all-trans-retinal (ATR); Lower panel: Kymographs of Ca<sup>2+</sup> dynamics during 15 s of  
909 blue illumination, along the white lines indicated in the upper panel, covering both dorsal and ventral BWMs.  
910 III, IV) Mean Ca<sup>2+</sup> signals ( $\Delta F/F \pm$  SEM) in dorsal and ventral BWM during the first 10 s of illumination (III) in  
911 animals raised with and without ATR and group data (IV), quantified during the first 2 s of illumination. B) I,  
912 II) Representative locomotion tracks of freely moving animals (raised with ATR) with Chr2 expressed only in  
913 AS MNs (I) or in all cholinergic MNs (II) before (20 s) and during photostimulation (20 s) by 470 nm blue light  
914 (indicated by blue shaded area; tracks are aligned such that they cross the blue area at the time of light onset).  
915 III) Schematic showing the thirteen points defining eleven 3-point angles along the spine of the animal. VI)  
916 Mean ( $\pm$  SEM) ratio of dorsal to ventral bending at the 2<sup>nd</sup> 3-point bending angle in animals expressing

917 AS::ChR2 during photostimulation (animals raised with and without ATR).V) Mean ( $\pm$  SEM) time traces of all  
918 3-point bending angles before and during blue illumination (blue bar; ChR2 in AS MNs or in all cholinergic  
919 MNs; raised with and without ATR). VI) Group data as in V, comparing 20 s blue light illumination (blue bar),  
920 to the 20 s before illumination. See also Supplementary Video S2. P values \*  $\leq$  0.05; \*\*  $\leq$  0.01; \*\*\*  $\leq$  0.001;  
921 number of animals is indicated. Statistical test in B III): T-Test; else: ANOVA with Tukey's post-hoc test.

922 **Figure 3. Optogenetic ablation and chronic hyperpolarization of AS MNs disrupts the locomotion**  
923 **pattern.** A) I) Schematic of optogenetic ablation of AS MNs by PH-miniSOG and connectivity to relevant cell  
924 types (arrows, chemical synapses; curved lines, electrical synapses); Quantification of mean  $\pm$  SEM speed (II)  
925 and bending angles (III) of animals without or with expression of PH-miniSOG (*via* the Q system) in AS MNs,  
926 following 150 s of blue light exposure and 2 h resting period; IV) Representative body posture kymographs (as  
927 in Fig. 1C) of wild type animal (upper panel) and animal expressing PH-miniSOG after photoactivation (lower  
928 panel). See also Supplementary Figure S3 and Supplementary Video 3. B) I) Schematic of  $Ca^{2+}$  imaging in  
929 BWM (RCaMP fluorescence) during hyperpolarization of AS MNs by HisCl1 (expressed in AS MNs *via* the Q  
930 system), and connectivity to relevant cell types (see also A I). II) Mean  $\pm$  SEM speed of freely moving animals  
931 on agar dishes without and with 10 mM histamine. III) Representative body posture kymographs of animals  
932 freely moving on agar without (upper) or with 10 mM histamine (after 240 s incubation; lower panel). IV)  
933 Representative fluorescent micrographs of  $Ca^{2+}$  activity in the BWM of animals mounted on agar slides without  
934 (left) or with 10 mM histamine (after 240 s incubation; right panel). V) Representative kymographs (20 sec) of  
935  $Ca^{2+}$  activity in dorsal and ventral BWM of animals as in IV. VI) Representative  $Ca^{2+}$  activity in dorsal and  
936 ventral BWM from animals as shown in IV, V. VII) Mean  $\pm$  SEM fluorescence of dorsal and ventral BWM as in  
937 VI. See also Supplementary Fig. S2 and Supplementary video S4. P values\*  $\leq$  0.05, \*\*\*  $\leq$  0.001; number of  
938 animals indicated in A II, III; B VII. Statistics: T-test for AII, III and B II; ANOVA with Tukey's post-hoc  
939 test.for B VII.

940 **Figure 4. Acute optogenetic hyperpolarization of AS MNs ceases locomotion, causes disinhibition of**  
941 **ventral BWM via GABAergic VD MNs, and blocks propagation of the locomotion body wave:** A)  
942 Schematic of experiment; hyperpolarization of AS MNs by the ACR1 anion channel rhodopsin activated by 470  
943 nm blue light (arrows, chemical synapses ). B) Time traces (I) and group data quantification (II) of mean  $\pm$  SEM  
944 speed before (15-20 s) and during (21-26 s) blue illumination (indicated by blue bar). Compared are strains  
945 expressing ACR1 in all VNC cholinergic neurons, or in AS MNs only (*via* the Q system), in wild type or *unc-*  
946 *47(e307)* mutant background, raised in the presence or absence of ATR, as indicated. C) Time traces (I) and  
947 group data quantification (II) of mean  $\pm$  SEM body length of the animals shown in B. D) Hyperpolarization of  
948 AS MNs in all (I), in the anterior (II), middle (III) and posterior (IV) segments of the worm body.  
949 Representative body postures kymographs of normalized 2-point angles from head to tail in animal expressing  
950 ACR1 in AS MNs before and during illumination by blue light in the indicated body segments. E) Mean,  
951 absolute difference of bending angles, from one video frame to the next (25 Hz), at each of eleven 3-point  
952 angles, for experiments as in (D). F) Mean difference of the differential bending angles between dark and  
953 illuminated conditions, for the analyses shown in (E). Data were averaged for the anterior 5 or the posterior 6 3-

954 pt bending angles. See also Supplementary Fig. S3 and Supplementary Videos S5-8. P values \*  $\leq 0.05$ ; \*\*  $\leq$   
955 0.01; number of animals is indicated. Statistics: ANOVA with Tukey's post hoc test.

956 **Figure 5. AS MNs show oscillatory  $\text{Ca}^{2+}$  activity in moving animals:** **A)** Fluorescent micrograph (red and  
957 green as merged fluorescence channels) of the vulva region, showing red (mCherry) and green (GCaMP6),  
958 expressed in AS MNs (with the use of Q system), and GFP, expressed in vulva muscles. Angle between vulva  
959 and the two flanking AS6 and AS7 neurons is indicated. **B)** Representative analysis of time traces (25 s) of  $\text{Ca}^{2+}$   
960 signals ( $\Delta\text{F}/\text{F}$ ) in AS6 and AS7, as well as the angle defined by the vulva and the two neurons during forward  
961 crawling, with a single reversal event (red bar). **C, D)** Cross-correlation analysis (mean  $\pm$  SEM) of single  
962 periods of the body wave (5 s each) for each of the AS6 and AS7 GCaMP6 signals with the vulva angle, as well  
963 as for the two  $\text{Ca}^{2+}$  signals, during forward (C) or backward (D) locomotion. **E)** Comparison of the peaks  $\text{Ca}^{2+}$   
964 signals (mean  $\pm$  SEM) in AS6 and AS7, during forward or reverse locomotion, respectively. See also  
965 Supplementary Video S9. Number of animals is indicated in C-E. Statistical test: ANOVA with Tukey's post-  
966 hoc test.

967 **Figure 6. Reciprocal and asymmetric mutual activation of AS MNs and forward and reverse PINs, AVB**  
968 **and AVA.** **A)** I) Schematic of the experiment for measurement of AS MN  $\text{Ca}^{2+}$  signals (GCaMP6) during AVB  
969 or AVA photodepolarization *via* Chr2 with 470 nm blue illumination (arrows, chemical synapses; curved lines,  
970 electrical synapses). II, III) Time traces of mean ( $\pm$  SEM)  $\text{Ca}^{2+}$  transients ( $\Delta\text{F}/\text{F}$ ) in AS MNs during  
971 depolarization of AVA (II) and AVB (III) by Chr2, in animals raised in absence or presence of ATR. Brackets  
972 indicate time periods used for statistical analysis in IV. IV) Group data quantification of data shown in II and III  
973 (for the 1-3 s time period). See also Supplementary Fig. S5 and Supplementary Videos S10, 11. **B)** I) Schematic  
974 of the experiment for measurement of  $\text{Ca}^{2+}$  signals (cameleon) in AVB or AVA PINs during AS MN  
975 photodepolarization *via* Chr2 with 470 nm blue illumination. II, III) Mean ( $\pm$  SEM) of  $\text{Ca}^{2+}$  transients ( $\Delta\text{R}/\text{R}$   
976 YFP/CFP ratios) in AVA (II) and AVB (III) during AS MN depolarization, in wild type or *unc-7(e5)* mutant  
977 animals, raised in absence or presence of ATR. IV) Group data quantification of experiments in II and III (for  
978 the 0-1 s time period). P values \*  $\leq 0.05$ ; \*\*  $\leq 0.01$ ; \*\*\*  $\leq 0.001$ ; number of animals is indicated. Statistical test:  
979 Mann-Whitney U test.

980 **Figure 7. Models summarizing findings of this work:** **A)** AS MNs control dorso-ventral bending coordination  
981 during forward and backward locomotion, by excitatory chemical transmission to dorsal muscles and ventral  
982 GABAergic VD MNs, thus causing ventral inhibition. Interconnections (arrows, chemical synapses; curved  
983 lines, electrical synapses; thickness of lines indicates relative synaptic strength) of AS MNs and their other  
984 synaptic partners, i.e. the PINs AVB and AVA, via both chemical synapses from the PINs and (reciprocal)  
985 electrical synapses from AS MNs are also shown. Data in this work suggest strong (chemical) excitatory  
986 regulation of AS MNs by AVB during forward locomotion, and reciprocal electrical regulation of AVA by AS  
987 MNs. **B)** Interconnections and functional roles of AS MNs and other VNC MNs during the propagation of the  
988 undulatory wave along the body. Depolarization (which could be initiated by AVB, not shown here, or by  
989 proprioceptive feedback from the adjacent body segment) of AS MNs causes contraction of the dorsal BWMs

990 and simultaneous relaxation of ventral BWMs through the excitation of VD MNs. This phase is followed by  
991 contraction of ventral BWMs, e.g. through the electric coupling of AS and VA MNs, and relaxation of the  
992 dorsal BWMs through VD-DD electrical coupling or VA-DD chemical synapses. Cholinergic (orange) and  
993 GABAergic (blue) cell types are indicated. Antero-posterior localization of cell bodies and connectivity to other  
994 cell types are arbitrary.

995

## 996 **Supplementary Figures**

997 **Figure S1. AS MN photostimulation induces postsynaptic currents and local AS neuron activation affects**  
998 **body length:** **A)** Representative postsynaptic currents evoked in dorsal muscle cell in response to  
999 photodepolarization (indicated by blue bar) of the AS MNs via ChR2. **B)** I, II) Speed and III, IV) body length  
1000 (time traces, I-IV, and group data, V, VI) before and during photodepolarization of AS MNs or of all cholinergic  
1001 MNs in the anterior, middle and posterior segments of the worm body by ChR2 (in animals raised with ATR). P  
1002 value  $* \leq 0.05$ ,  $** \leq 0.01$ ,  $*** \leq 0.001$ ; number of animals is indicated. Statistical test: ANOVA with Tukey's  
1003 post-hoc test.

1004 **Figure S2. Optogenetic inactivation and HisCl1-induced hyperpolarization of AS MNs affects locomotion**  
1005 **speed and bending angles:** **A)** Time traces of mean ( $\pm$  SEM) speed (I) and bending angles (II) of freely moving  
1006 wild type animals, or animals expressing PH-miniSOG in AS MNs, 2 h after 150 s of blue light exposure. **B)**  
1007 Time traces of mean ( $\pm$  SEM) speed of freely moving animals expressing HisCl1 in AS MNs, comparing  
1008 animals on plates without and with 10 mM histamine. Number of animals tested is indicated.

1009 **Figure S3. Local stimulation of AS MNs in different body segments:** **A)** Schematic showing how the 13  
1010 points defining 11 3-point angles correspond to the 11 body segments that were individually illuminated. **B)**  
1011 Mean speed (I, II) and body length (III, IV) of animals expressing ACR1 in AS MNs, in which the indicated  
1012 body segments were illuminated. Group data shown in II, IV. **C)** The extrachromosomal array expressing ACR1  
1013 in the *unc-47(e307)* mutant as shown in main Fig. 4B, C functions as expected in wt background. P value  $* \leq$   
1014 0.05; number of animals is indicated. Statistical test in B: ANOVA with Tukey's post-hoc test.

1015 **Figure S4. AS MNs are simultaneously activated by photostimulation of the AVA and AVB PINs:** **A, B)**  
1016 Cross-correlation analysis of GCaMP6 fluorescence signals ( $\Delta F/F$ ) in AS3 and AS8 neurons, during  
1017 photodepolarization of AVA (A) or AVB (B), expressing ChR2, respectively, in animals raised in the presence  
1018 of ATR.

1019

## 1020 **Supplementary Videos**

1021 **Video 1.** Freely moving animal before and during photodepolarization of AS MNs by ChR2 (in animal raised  
1022 with ATR), blue light = 470 nm, 1.8 mW/mm<sup>2</sup>. Video plays at 3x speed (75 f/s).

- 1023 **Video 2.** Ca<sup>2+</sup> signal in the BWM expressing GCaMP3 during photodepolarization of AS MNs by ChR2 (in  
1024 animal raised with ATR), blue light = 470 nm, 1.2 mW/mm<sup>2</sup>. Video plays at 3x speed (75 f/s).
- 1025 **Video 3.** Freely moving animal, 2 hours after optogenetic ablation (150 s) of AS MNs by PH-miniSOG.
- 1026 **Video 4.** Freely moving animal expressing HisCl1 after 4 min exposure on 10 mM histamine. Video plays at 3x  
1027 speed (75 f/s).
- 1028 **Video 5.** Freely moving animal expressing ACR1 in AS MNs before (20 s) and during ACR1 photoactivation  
1029 by 470 nm 1.8 mW/mm<sup>2</sup> blue light. Video plays at 3x speed (75 f/s).
- 1030 **Video 6.** Selective illumination of anterior segment. Freely moving animal expressing ACR1 in AS MNs before  
1031 (20 s) and during ACR1 photoactivation by 470 nm 1.8 mW/mm<sup>2</sup> blue light. Video plays at 3x speed (75 f/s).
- 1032 **Video 7.** Selective illumination of midbody segment. Freely moving animal expressing ACR1 in AS MNs  
1033 before (20 s) and during ACR1 photoactivation by 470 nm 1.8 mW/mm<sup>2</sup> blue light. Video plays at 3x speed (75  
1034 f/s).
- 1035 **Video 8.** Selective illumination of posterior segment. Freely moving animal expressing ACR1 in AS MNs  
1036 before (20 s) and during ACR1 photoactivation by 470 nm 1.8 mW/mm<sup>2</sup> blue light. Video plays at 3x speed (75  
1037 f/s).
- 1038 **Video 9.** Moving animal expressing GCaMP6 and mCherry in the AS MNs while the animal is being  
1039 automatically tracked *via* the GFP marker in vulva muscles. Video plays at 0.35x speed (7 f/s).
- 1040 **Video 10.** Ca<sup>2+</sup> signal in the AS MNs expressing GCaMP6 during photodepolarization of the AVA PIN by  
1041 ChR2 (in animal raised with ATR), 470 nm blue light, 1.2 mW/mm<sup>2</sup>. Video plays at 3x speed (75 f/s).
- 1042 **Video 11.** Ca<sup>2+</sup> signal in the AS MNs expressing GCaMP6 during photodepolarization of AVB by ChR2 (in  
1043 animal raised with ATR), 470 nm blue light, 1.2 mW/mm<sup>2</sup>. Video plays at 3x speed (75 f/s).

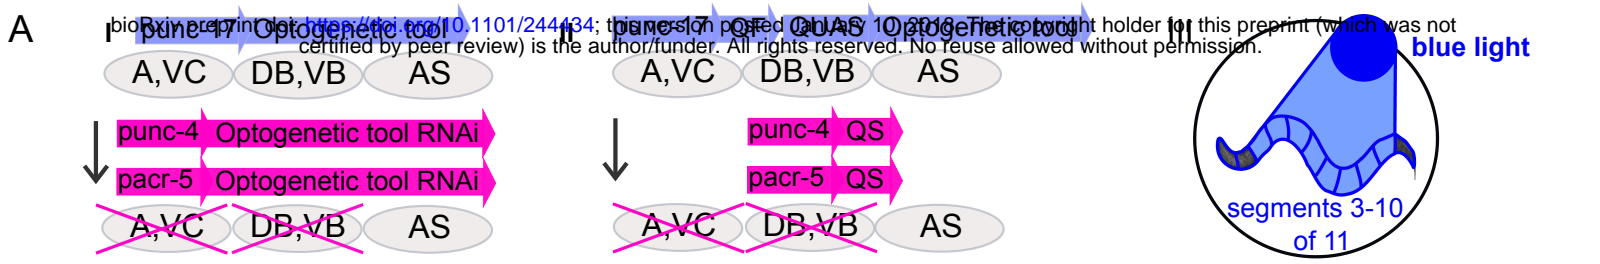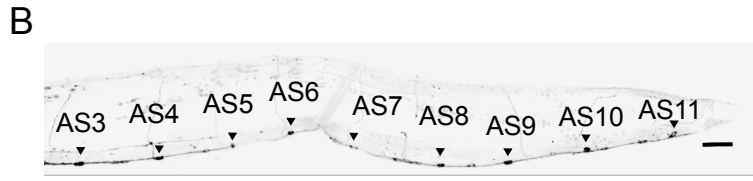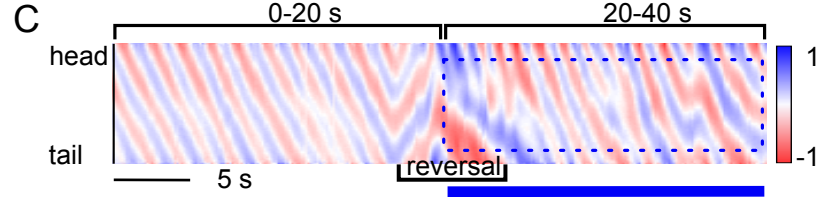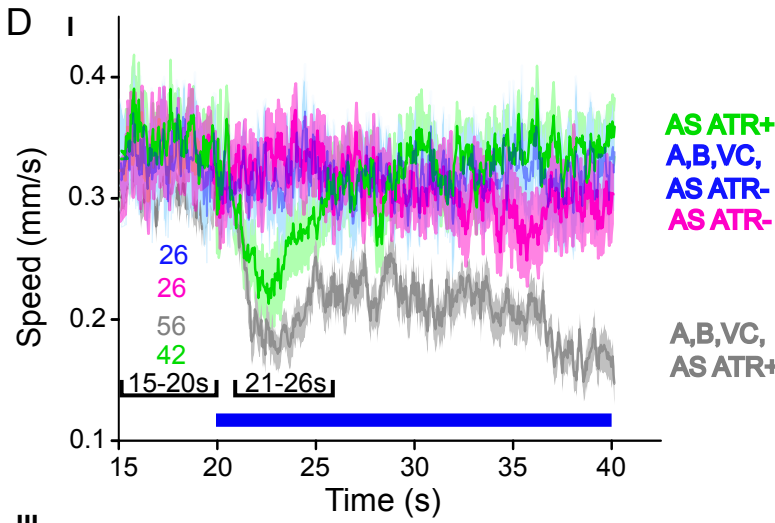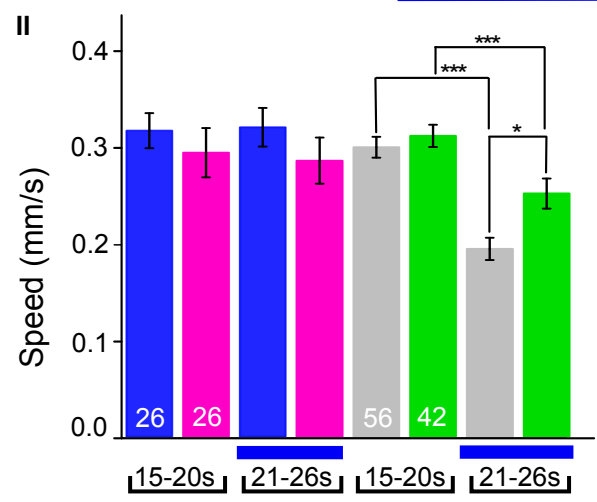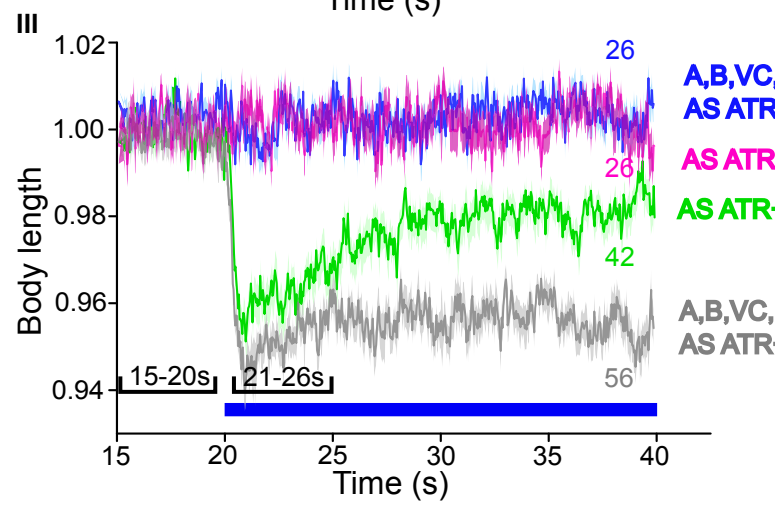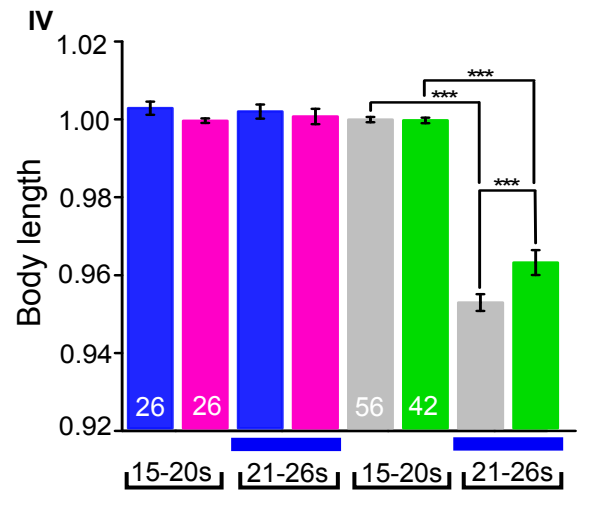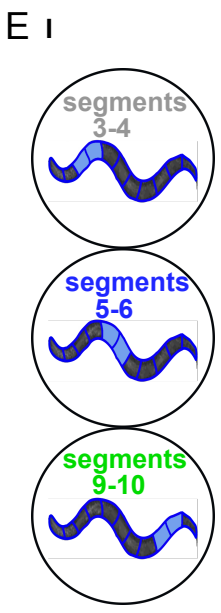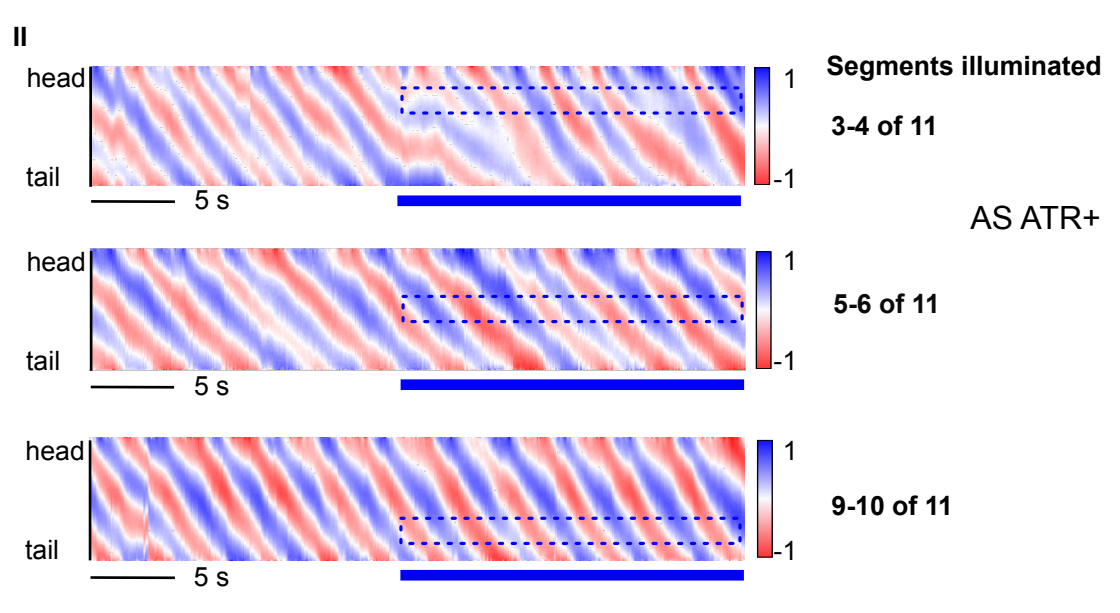

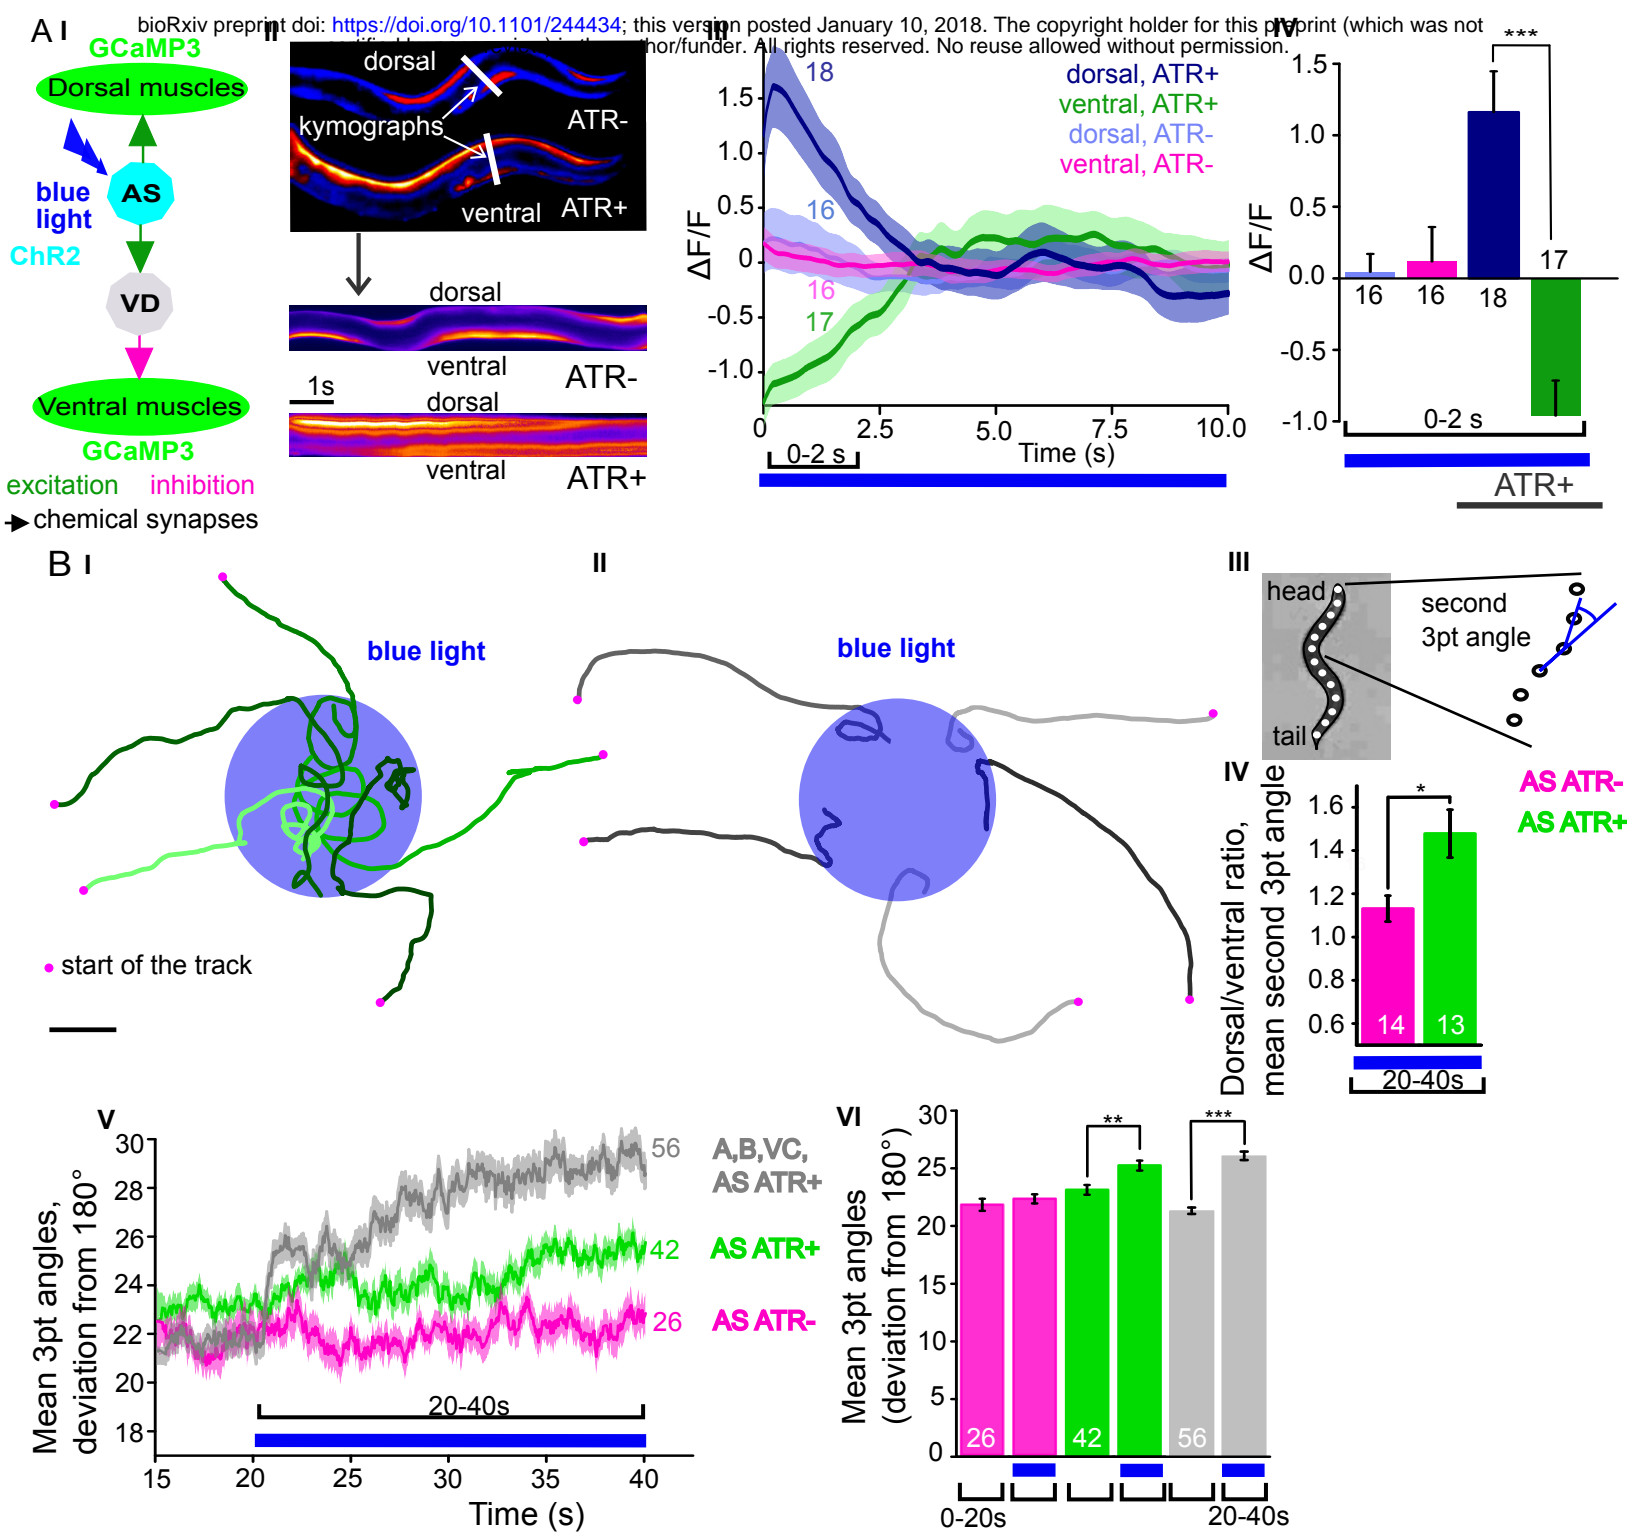



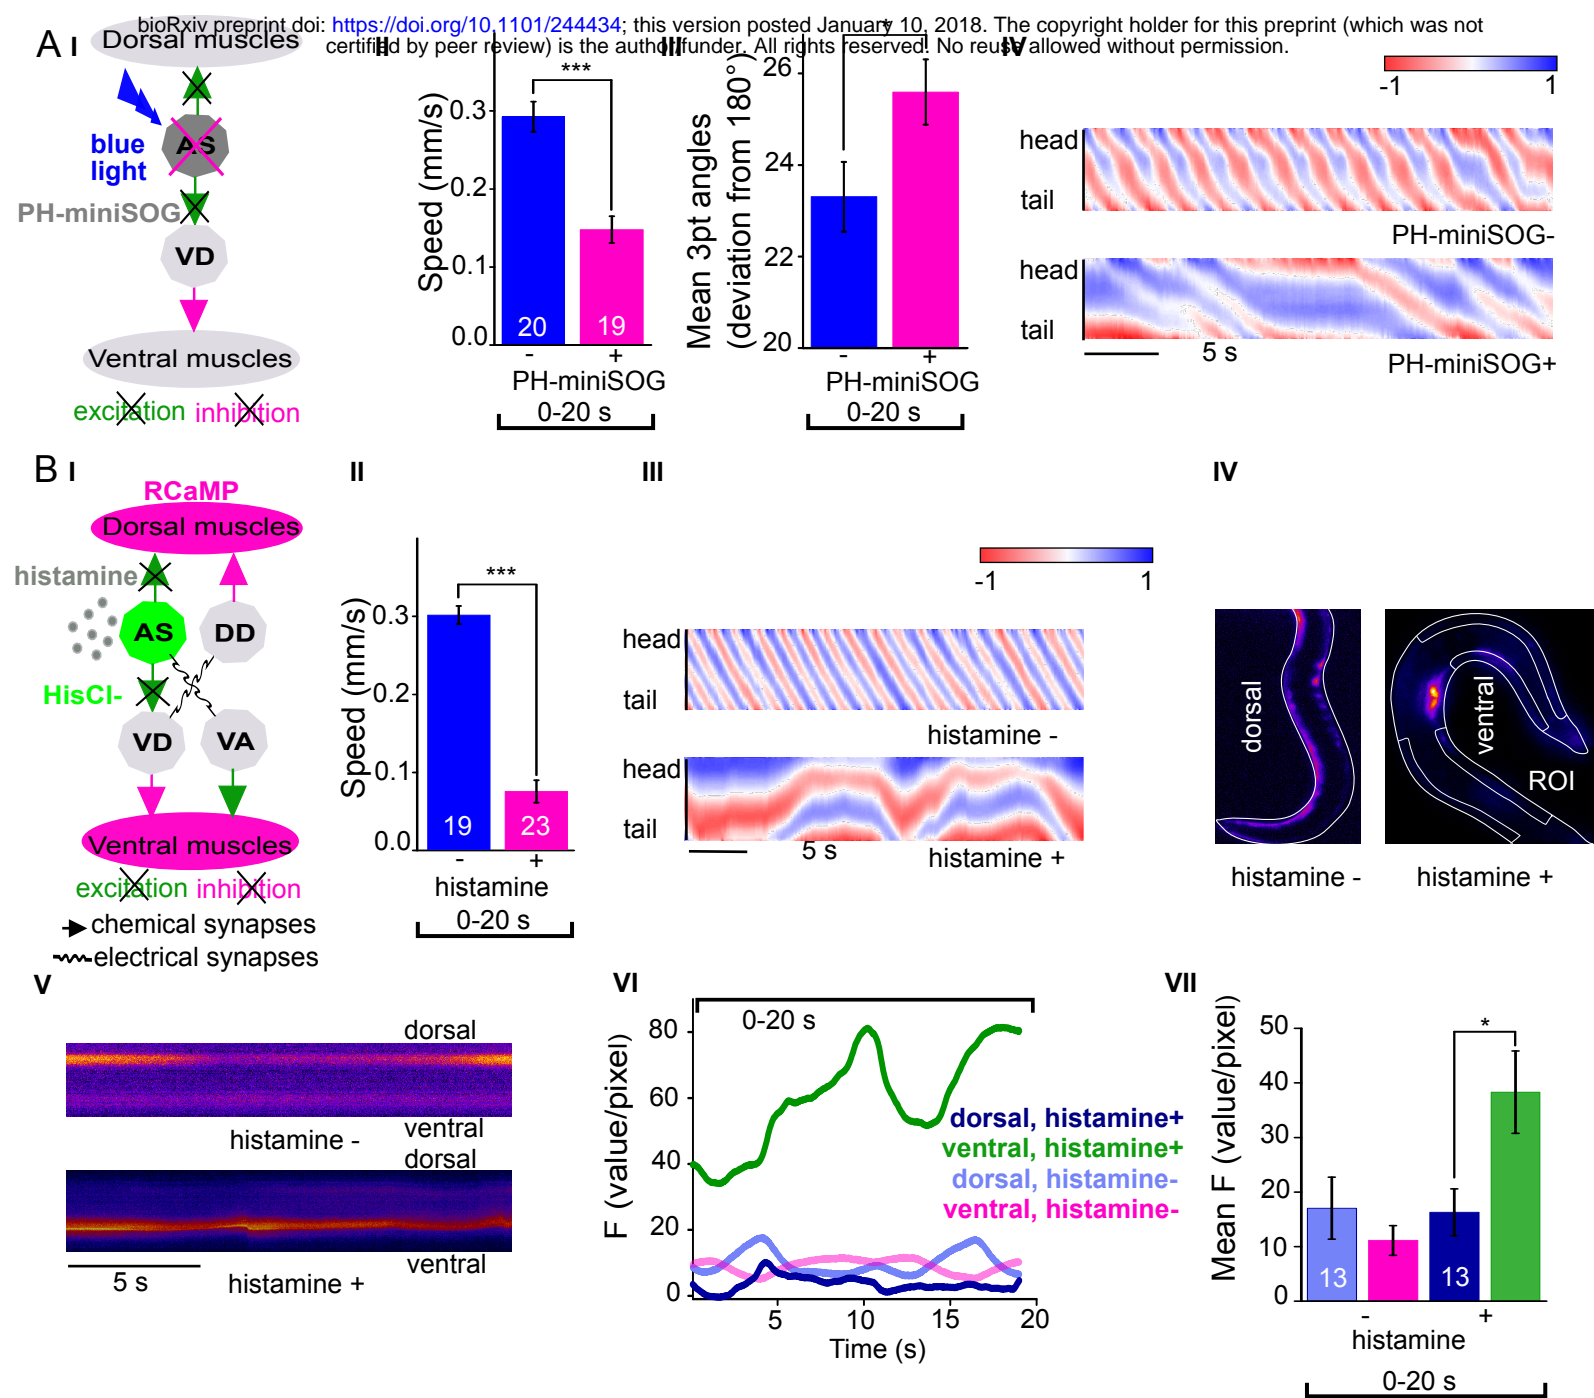

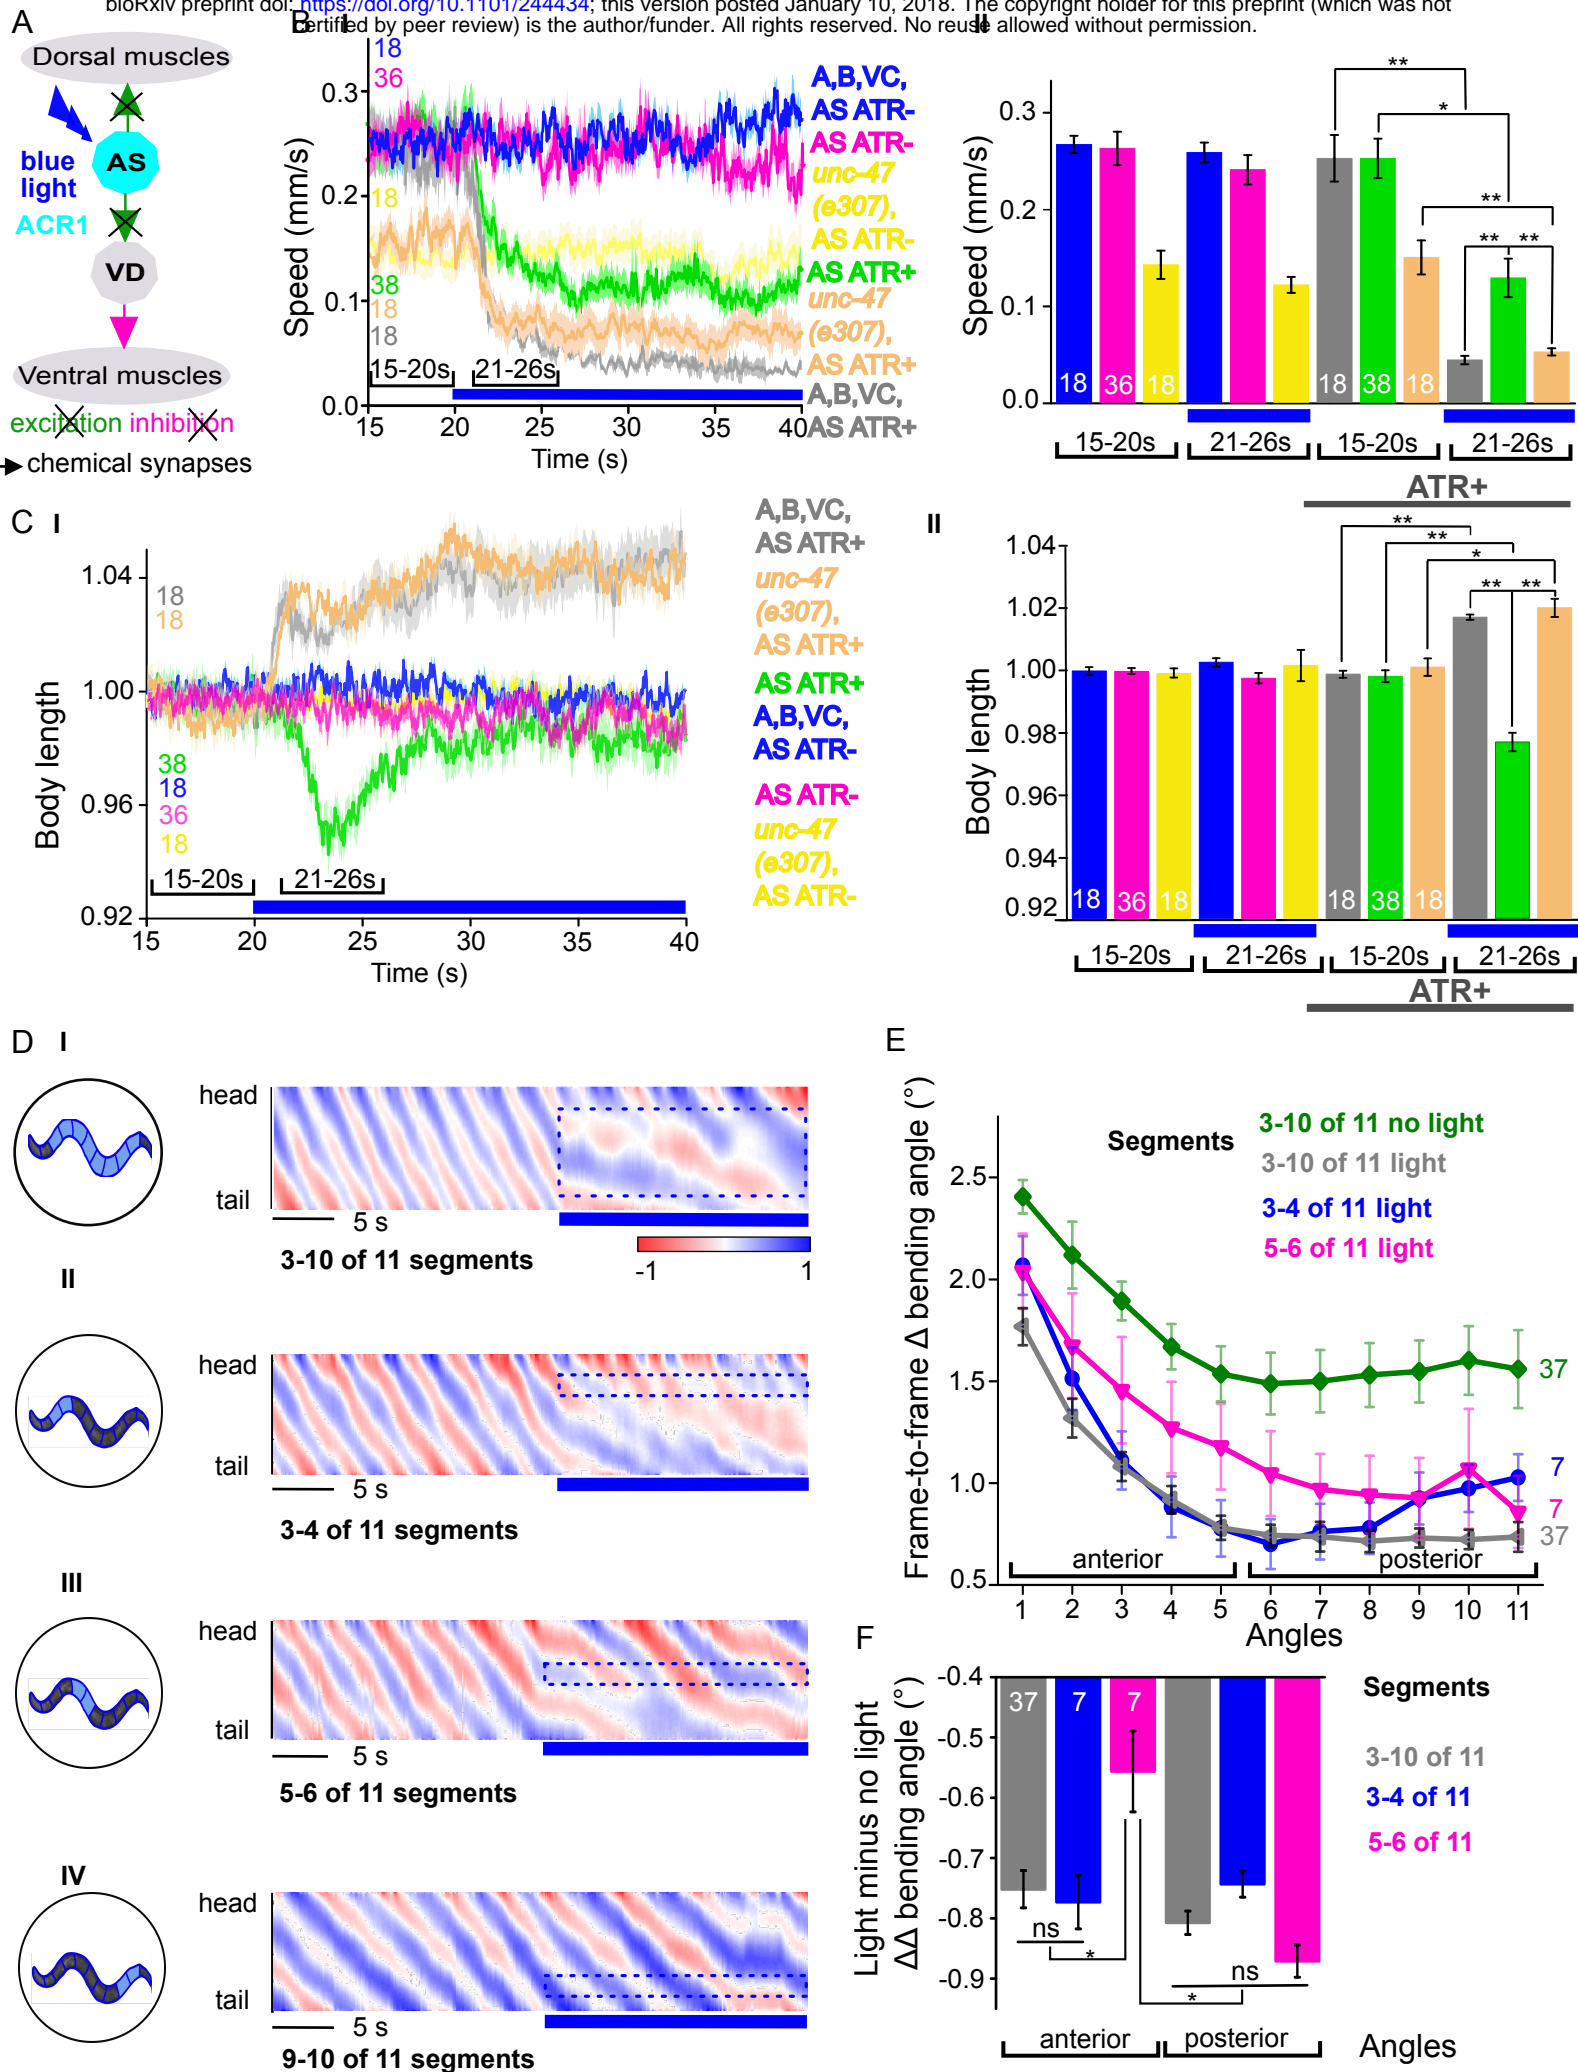

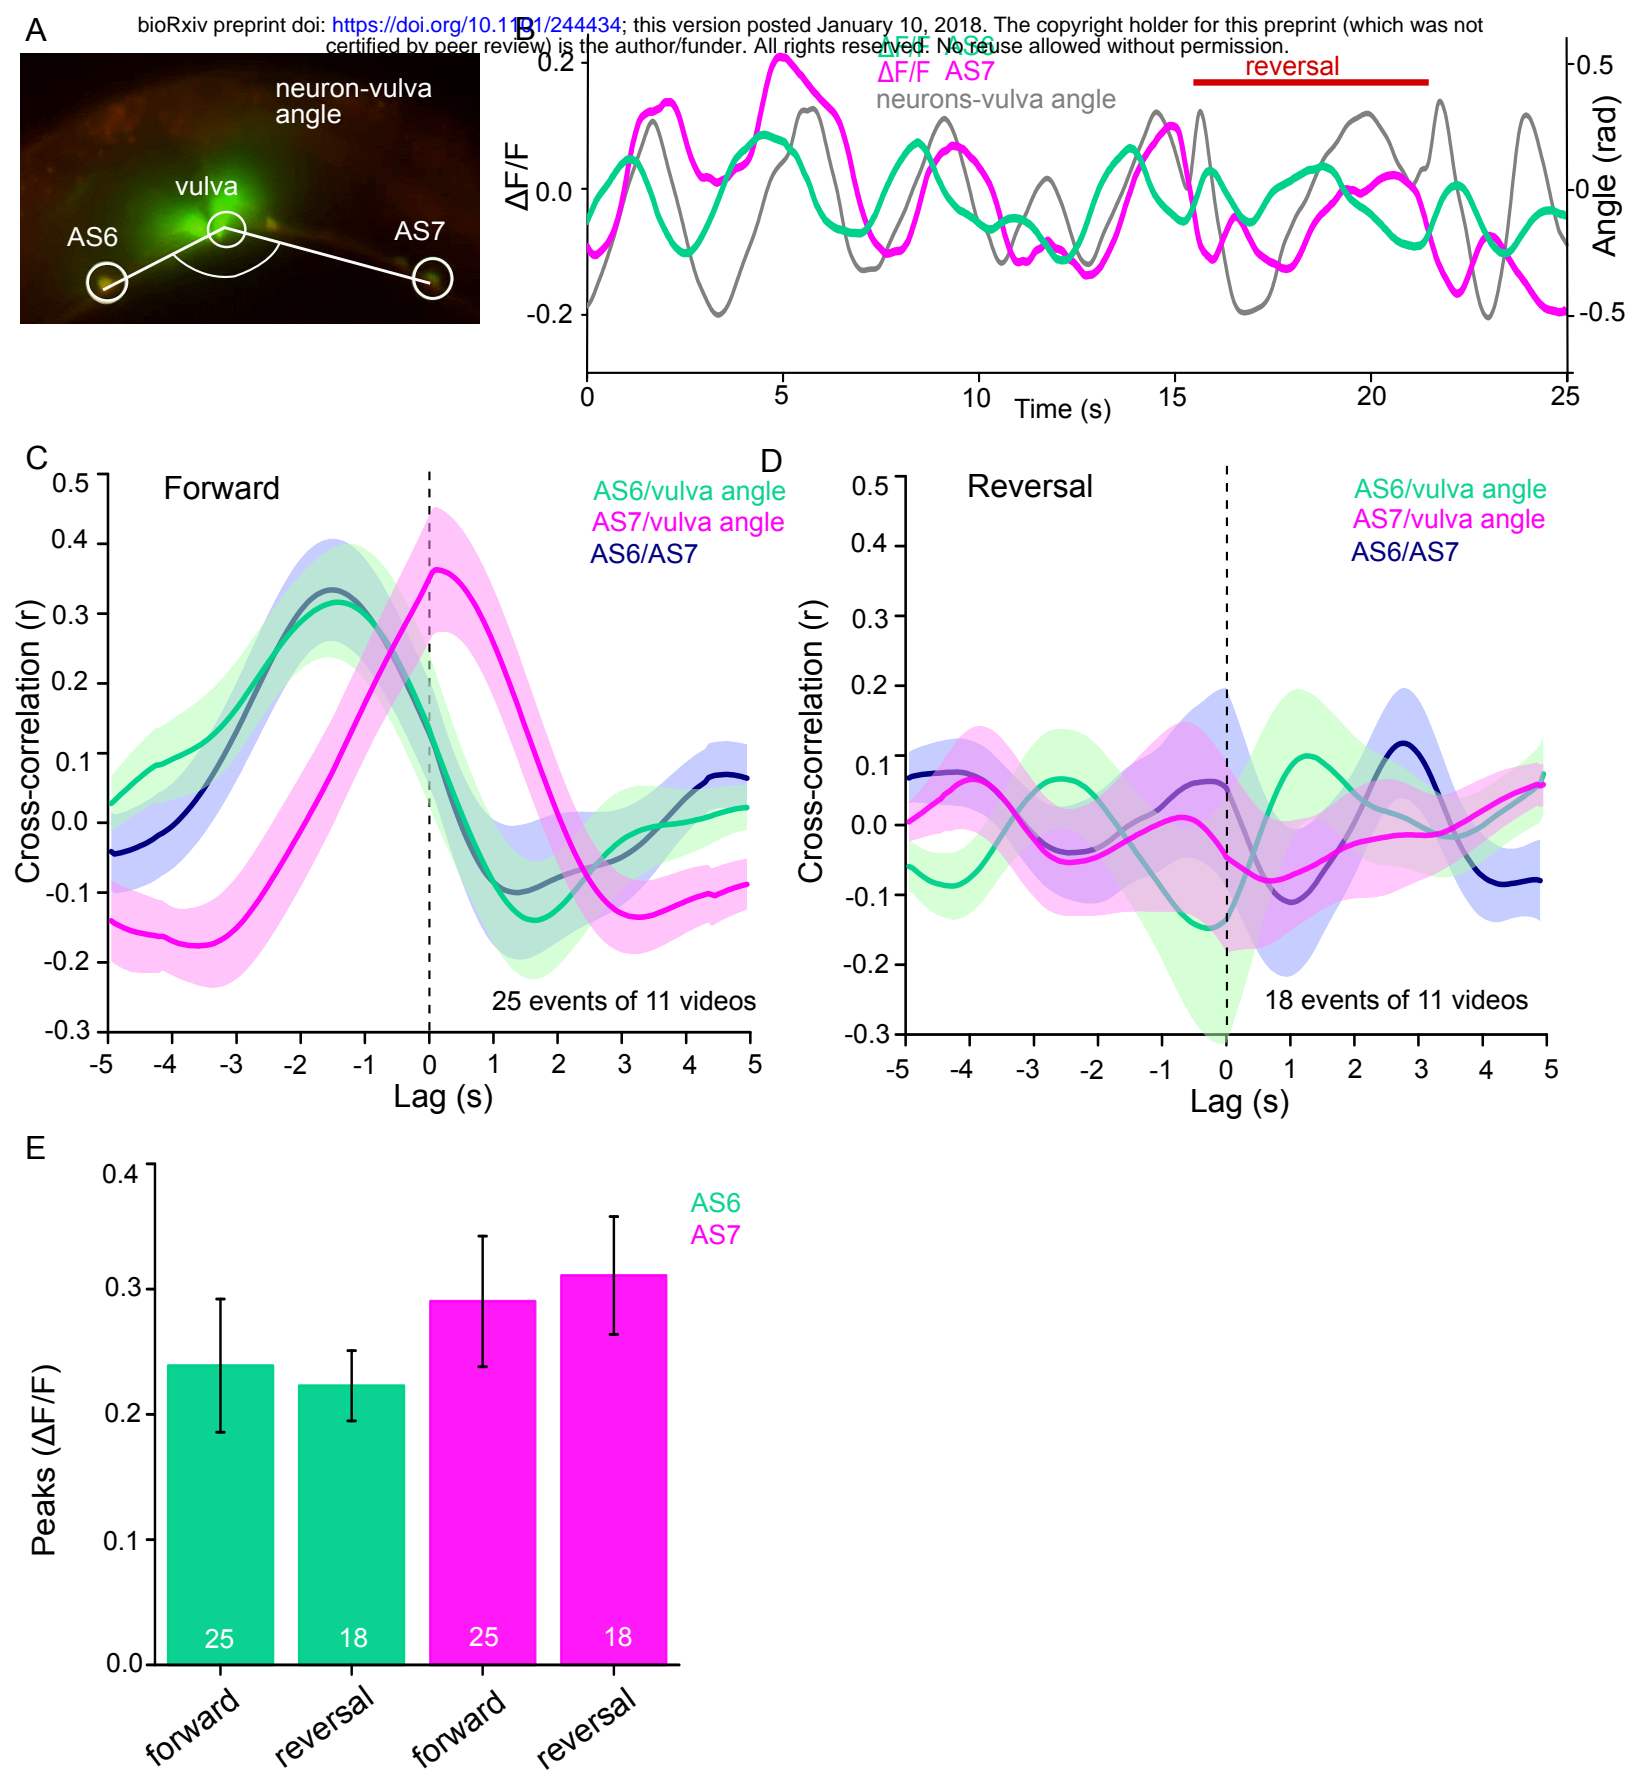

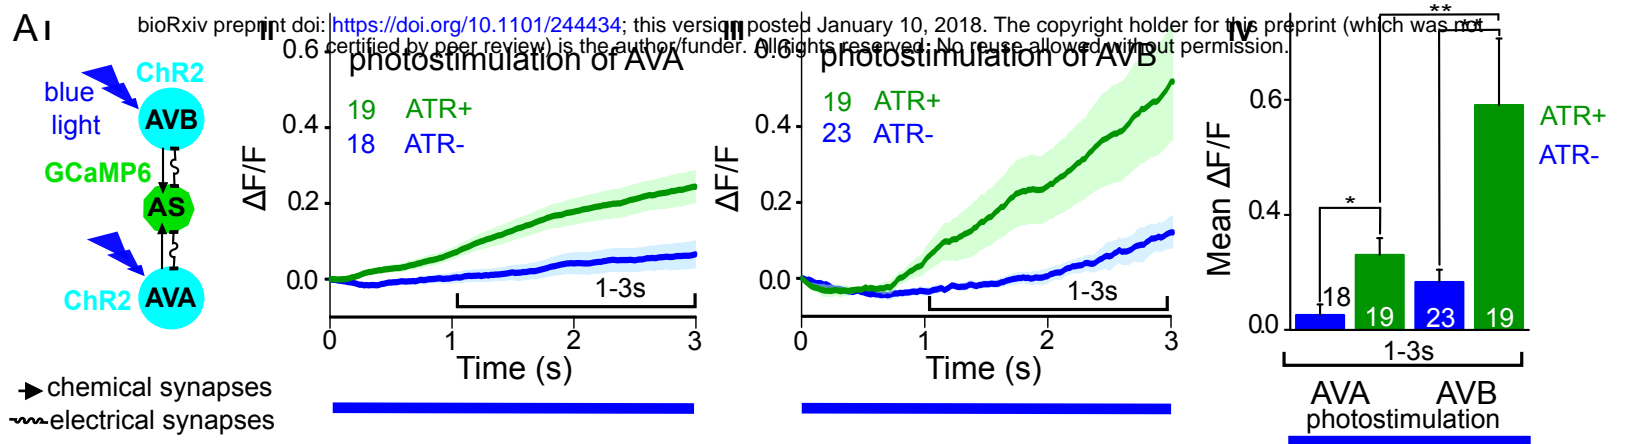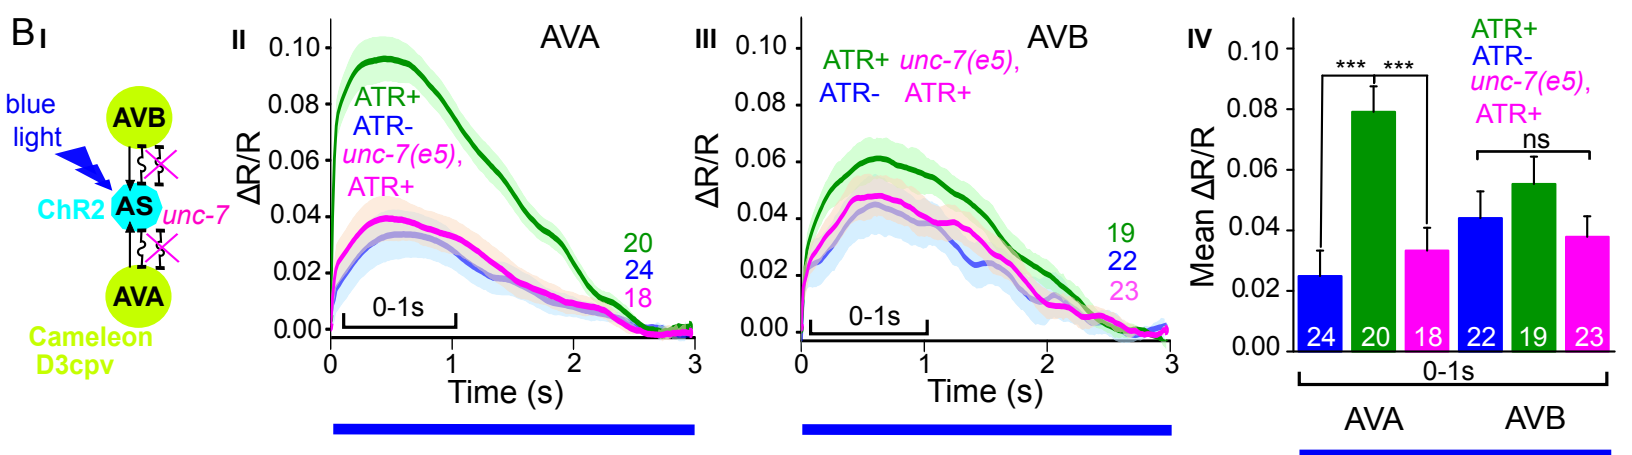

**A**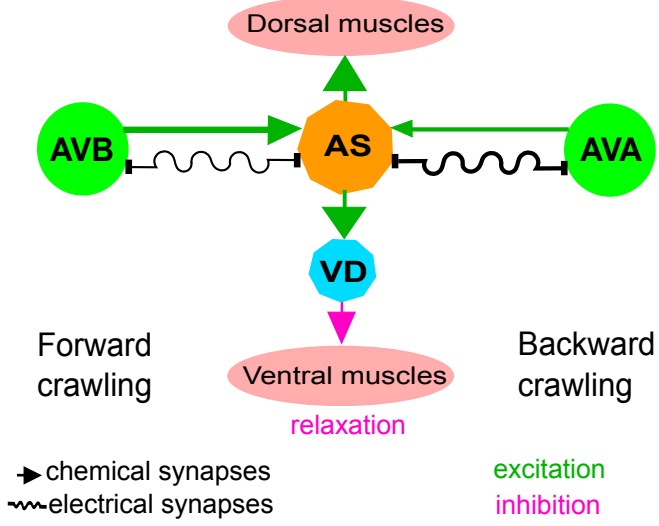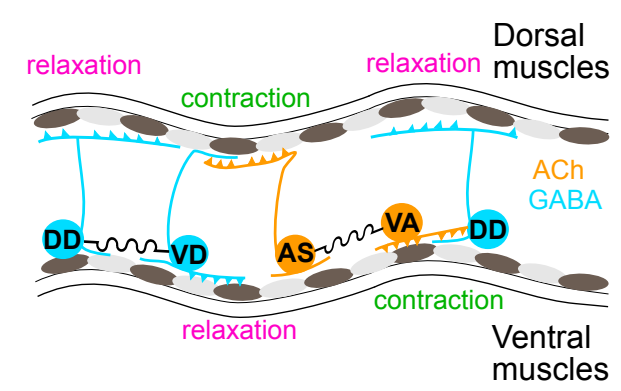

Source: https://www.biorxiv.org/content/10.1101/244434v1.full.pdf
